# Supplementary material for: Overestimating Fish Counts by Non-Instantaneous Visual Censuses: Consequences for Population and Community Descriptions
Source: PLoS One. 2010 Jul 22;5(7):e11722. doi: 10.1371/journal.pone.0011722 (PMC2908695; doi:10.1371/journal.pone.0011722)
Supplement: Table S1 — Bias results produced by AnimDens (2.44 MB XLS) [file pone.0011722.s002.xls]

## Sheet: Information
Table A1 contains the relative bias values for each combination of the parameters listed in the table below.
These biases were obtained by the simulation model AnimDens.
In total, 16,632 model combinations were run.
Note:
These biases are the result of one run of AnimDens.
Running AnimDens 30 times for a set of desired survey conditions would provide even better estimates of bias.
To make corrections to observed values (values observed in the field by non-instantaneous surveys):
1. Decide on Targeted fish and select an appropriate speed and turning angle for that species for a given dive.
2. Select most appropriate sampling values (e.g. transect width, swim speed, survey time, etc.) Note:for visibility, select the distance you would be sure to detect the Targeted fish
4. Divide your observed count, density, or biomass by the Factor value to get the corrected value.
5. Repeat for other species.
*Note that the final area visually surveyed is a snapshot and therefore the bias values are conservative
**If you want to determine the bias associated with counting a school of fish then use the simulation to get the bias for an individual (e.g. treat each school as an individual) and then correct for the number of individuals (or biomass) in that school.
Parameter values evaluated in AnimDens simulation:
Fish speed (m·s-1)	Survey time (s)	Visibility (m)	Transect width (m)	Diver speed (m·min-1)	Fish turning angle (°)
0	60	10	1	1	1
0.001	300	20	2	4	22.5
0.01	600	30	4	7	45
0.1	900	40	5
0.2	1200		8
0.4	1800		10
0.6			20
0.8
1
2
4

## Sheet: TableA1
FishSpeed	SurveyTime	Visibility distance(m)	Transect Width (m)	Transect Diver Speed (m/s)	SharkAngle	Transect Relative Bias	Stationary Relative Bias	Transect Factor Value	Stationary Factor Value
0	60	10	1	0.0166667	1	0.283	-0.259	1.28291	0.741178
0.001	60	10	1	0.0166667	1	0.283	-0.236	1.28291	0.763638
0.01	60	10	1	0.0166667	1	0.924	-0.191	1.92436	0.808558
0.1	60	10	1	0.0166667	1	4.77	0.393	5.77309	1.39252
0.2	60	10	1	0.0166667	1	7.98	0.797	8.98036	1.7968
0.4	60	10	1	0.0166667	1	14.4	1.2	15.3949	2.20107
0.4	60	10	1	0.0166667	1	14.4	1.2	15.3949	2.20107
0.6	60	10	1	0.0166667	1	25.3	1.9	26.2996	2.89733
0.8	60	10	1	0.0166667	1	32.4	2.39	33.3556	3.39145
1	60	10	1	0.0166667	1	24	2.41	25.0167	3.41391
2	60	10	1	0.0166667	1	36.8	5.15	37.8458	6.15402
4	60	10	1	0.0166667	1	44.5	10.5	45.5433	11.477
0	60	10	1	0.0166667	22.5	0.283	-0.0118	1.28291	0.988237
0.001	60	10	1	0.0166667	22.5	0.283	-0.0118	1.28291	0.988237
0.01	60	10	1	0.0166667	22.5	0.924	0.0107	1.92436	1.0107
0.1	60	10	1	0.0166667	22.5	5.41	0.123	6.41454	1.123
0.2	60	10	1	0.0166667	22.5	4.13	0.145	5.13163	1.14546
0.4	60	10	1	0.0166667	22.5	8.62	0.662	9.62181	1.66204
0.4	60	10	1	0.0166667	22.5	8.62	0.662	9.62181	1.66204
0.6	60	10	1	0.0166667	22.5	14.4	1.4	15.3949	2.40321
0.8	60	10	1	0.0166667	22.5	20.8	1.83	21.8094	2.82995
1	60	10	1	0.0166667	22.5	29.1	2.71	30.1484	3.70589
2	60	10	1	0.0166667	22.5	49	6.07	50.0334	7.07488
4	60	10	1	0.0166667	22.5	52.9	11.4	53.8822	12.3754
0	60	10	1	0.0166667	45	0.283	0.235	1.28291	1.2353
0.001	60	10	1	0.0166667	45	0.283	0.235	1.28291	1.2353
0.01	60	10	1	0.0166667	45	0.283	0.258	1.28291	1.25776
0.1	60	10	1	0.0166667	45	1.57	0.0332	2.56582	1.03316
0.2	60	10	1	0.0166667	45	2.85	0.684	3.84873	1.6845
0.4	60	10	1	0.0166667	45	14.4	1.16	15.3949	2.15615
0.4	60	10	1	0.0166667	45	14.4	1.16	15.3949	2.15615
0.6	60	10	1	0.0166667	45	13.1	0.662	14.112	1.66204
0.8	60	10	1	0.0166667	45	15	1.18	16.0364	2.17861
1	60	10	1	0.0166667	45	26.6	2.35	27.5825	3.34653
2	60	10	1	0.0166667	45	34.3	5.22	35.28	6.2214
4	60	10	1	0.0166667	45	51.6	10.9	52.5993	11.9262
0	60	10	1	0.0666667	1	0.512	0.0332	1.512	1.03316
0.001	60	10	1	0.0666667	1	0.512	0.0332	1.512	1.03316
0.01	60	10	1	0.0666667	1	0.008	0.0556	1.008	1.05562
0.1	60	10	1	0.0666667	1	4.54	0.482	5.544	1.48236
0.2	60	10	1	0.0666667	1	4.04	0.46	5.04	1.4599
0.4	60	10	1	0.0666667	1	10.1	0.909	11.088	1.90909
0.4	60	10	1	0.0666667	1	10.1	0.909	11.088	1.90909
0.6	60	10	1	0.0666667	1	16.1	2.12	17.136	3.12193
0.8	60	10	1	0.0666667	1	20.7	2.64	21.672	3.63851
1	60	10	1	0.0666667	1	24.2	3.02	25.2	4.02033
2	60	10	1	0.0666667	1	36.3	5.87	37.296	6.87274
4	60	10	1	0.0666667	1	38.3	10.7	39.312	11.7241
0	60	10	1	0.0666667	22.5	-0.496	-0.0118	0.504	0.988237
0.001	60	10	1	0.0666667	22.5	-0.496	-0.0118	0.504	0.988237
0.01	60	10	1	0.0666667	22.5	0.008	-0.0118	1.008	0.988237
0.1	60	10	1	0.0666667	22.5	1.52	0.303	2.52	1.30268
0.2	60	10	1	0.0666667	22.5	3.03	0.46	4.032	1.4599
0.4	60	10	1	0.0666667	22.5	5.55	0.797	6.552	1.7968
0.4	60	10	1	0.0666667	22.5	5.55	0.797	6.552	1.7968
0.6	60	10	1	0.0666667	22.5	11.1	1.61	12.096	2.60535
0.8	60	10	1	0.0666667	22.5	16.6	2.23	17.64	3.23423
1	60	10	1	0.0666667	22.5	25.2	2.21	26.208	3.21177
2	60	10	1	0.0666667	22.5	31.3	5.45	32.256	6.446
4	60	10	1	0.0666667	22.5	35.8	10.5	36.792	11.5444
0	60	10	1	0.0666667	45	0.008	-0.191	1.008	0.808558
0.001	60	10	1	0.0666667	45	0.008	-0.191	1.008	0.808558
0.01	60	10	1	0.0666667	45	0.008	-0.147	1.008	0.853478
0.1	60	10	1	0.0666667	45	3.54	0.37	4.536	1.37006
0.2	60	10	1	0.0666667	45	6.06	0.235	7.056	1.2353
0.4	60	10	1	0.0666667	45	6.56	0.729	7.56	1.72942
0.4	60	10	1	0.0666667	45	6.56	0.729	7.56	1.72942
0.6	60	10	1	0.0666667	45	11.1	1.02	12.096	2.02139
0.8	60	10	1	0.0666667	45	15.6	1.76	16.632	2.76257
1	60	10	1	0.0666667	45	17.1	2.03	18.144	3.03209
2	60	10	1	0.0666667	45	27.2	4.48	28.224	5.48022
4	60	10	1	0.0666667	45	36.8	9.89	37.8	10.8931
0	60	10	1	0.116667	1	-0.17	0.0556	0.830117	1.05562
0.001	60	10	1	0.116667	1	-0.585	0.0556	0.415059	1.05562
0.01	60	10	1	0.116667	1	-0.585	0.123	0.415059	1.123
0.1	60	10	1	0.116667	1	0.66	0.325	1.66023	1.32514
0.2	60	10	1	0.116667	1	4.81	0.662	5.81082	1.66204
0.4	60	10	1	0.116667	1	8.55	1.22	9.54635	2.22353
0.4	60	10	1	0.116667	1	8.55	1.22	9.54635	2.22353
0.6	60	10	1	0.116667	1	10.6	1.58	11.6216	2.58289
0.8	60	10	1	0.116667	1	16	2.08	17.0174	3.07701
1	60	10	1	0.116667	1	17.7	2.3	18.6776	3.30161
2	60	10	1	0.116667	1	27.6	5.09	28.639	6.08664
4	60	10	1	0.116667	1	30.1	10.3	31.1294	11.3198
0	60	10	1	0.116667	22.5	1.08	0.19	2.07529	1.19038
0.001	60	10	1	0.116667	22.5	1.49	0.19	2.49035	1.19038
0.01	60	10	1	0.116667	22.5	1.49	0.235	2.49035	1.2353
0.1	60	10	1	0.116667	22.5	1.49	0.393	2.49035	1.39252
0.2	60	10	1	0.116667	22.5	5.23	0.797	6.22588	1.7968
0.4	60	10	1	0.116667	22.5	9.38	1.04	10.3765	2.04385
0.4	60	10	1	0.116667	22.5	9.38	1.04	10.3765	2.04385
0.6	60	10	1	0.116667	22.5	9.79	1.52	10.7915	2.51551
0.8	60	10	1	0.116667	22.5	16.8	1.9	17.8475	2.89733
1	60	10	1	0.116667	22.5	18.1	2.41	19.0927	3.41391
2	60	10	1	0.116667	22.5	34.7	5.36	35.695	6.35616
4	60	10	1	0.116667	22.5	35.1	10.8	36.1101	11.769
0	60	10	1	0.116667	45	1.91	0.0332	2.90541	1.03316
0.001	60	10	1	0.116667	45	1.91	0.0332	2.90541	1.03316
0.01	60	10	1	0.116667	45	1.91	0.0556	2.90541	1.05562
0.1	60	10	1	0.116667	45	1.49	0.145	2.49035	1.14546
0.2	60	10	1	0.116667	45	1.08	0.19	2.07529	1.19038
0.4	60	10	1	0.116667	45	3.15	0.482	4.15059	1.48236
0.4	60	10	1	0.116667	45	3.15	0.482	4.15059	1.48236
0.6	60	10	1	0.116667	45	6.47	0.819	7.47106	1.81926
0.8	60	10	1	0.116667	45	9.79	1.2	10.7915	2.20107
1	60	10	1	0.116667	45	18.9	2.3	19.9228	3.30161
2	60	10	1	0.116667	45	29.7	4.32	30.7143	5.32301
4	60	10	1	0.116667	45	23.9	9.65	24.9035	10.646
0	60	10	2	0.0166667	1	-0.359	0.19	0.641454	1.19038
0.001	60	10	2	0.0166667	1	-0.0378	-0.236	0.962182	0.763638
0.01	60	10	2	0.0166667	1	-0.0378	-0.191	0.962182	0.808558
0.1	60	10	2	0.0166667	1	1.89	0.527	2.88654	1.52728
0.2	60	10	2	0.0166667	1	4.13	0.797	5.13163	1.7968
0.4	60	10	2	0.0166667	1	7.98	1.2	8.98036	2.20107
0.6	60	10	2	0.0166667	1	13.1	1.9	14.112	2.89733
0.8	60	10	2	0.0166667	1	17.3	2.39	18.2814	3.39145
1	60	10	2	0.0166667	1	13.4	2.41	14.4327	3.41391
2	60	10	2	0.0166667	1	27.9	5.15	28.8654	6.15402
4	60	10	2	0.0166667	1	42.9	10.5	43.9396	11.477
0	60	10	2	0.0166667	22.5	0.283	-0.124	1.28291	0.875938
0.001	60	10	2	0.0166667	22.5	-0.0378	-0.0118	0.962182	0.988237
0.01	60	10	2	0.0166667	22.5	-0.0378	0.0107	0.962182	1.0107
0.1	60	10	2	0.0166667	22.5	0.283	0.0107	1.28291	1.0107
0.2	60	10	2	0.0166667	22.5	2.21	0.145	3.20727	1.14546
0.4	60	10	2	0.0166667	22.5	4.45	0.662	5.45236	1.66204
0.6	60	10	2	0.0166667	22.5	8.3	1.4	9.30109	2.40321
0.8	60	10	2	0.0166667	22.5	12.1	1.83	13.1498	2.82995
1	60	10	2	0.0166667	22.5	15.4	2.71	16.3571	3.70589
2	60	10	2	0.0166667	22.5	34.6	6.07	35.6007	7.07488
4	60	10	2	0.0166667	22.5	49.4	11.4	50.3542	12.3754
0	60	10	2	0.0166667	45	0.283	-0.214	1.28291	0.786098
0.001	60	10	2	0.0166667	45	0.283	0.235	1.28291	1.2353
0.01	60	10	2	0.0166667	45	0.604	0.258	1.60364	1.25776
0.1	60	10	2	0.0166667	45	0.604	0.46	1.60364	1.4599
0.2	60	10	2	0.0166667	45	2.21	0.684	3.20727	1.6845
0.4	60	10	2	0.0166667	45	7.02	1.16	8.01818	2.15615
0.6	60	10	2	0.0166667	45	6.7	0.662	7.69745	1.66204
0.8	60	10	2	0.0166667	45	8.3	1.18	9.30109	2.17861
1	60	10	2	0.0166667	45	13.1	2.35	14.112	3.34653
2	60	10	2	0.0166667	45	23.7	5.22	24.696	6.2214
4	60	10	2	0.0166667	45	43.9	10.9	44.9018	11.9262
0	60	10	2	0.0666667	1	0.26	0.168	1.26	1.16792
0.001	60	10	2	0.0666667	1	0.008	0.0332	1.008	1.03316
0.01	60	10	2	0.0666667	1	0.26	0.0556	1.26	1.05562
0.1	60	10	2	0.0666667	1	2.02	0.348	3.024	1.3476
0.2	60	10	2	0.0666667	1	2.28	0.46	3.276	1.4599
0.4	60	10	2	0.0666667	1	5.3	0.909	6.3	1.90909
0.6	60	10	2	0.0666667	1	9.08	2.12	10.08	3.12193
0.8	60	10	2	0.0666667	1	11.3	2.64	12.348	3.63851
1	60	10	2	0.0666667	1	13.4	3.02	14.364	4.02033
2	60	10	2	0.0666667	1	26	5.87	26.964	6.87274
4	60	10	2	0.0666667	1	35.3	10.7	36.288	11.7241
0	60	10	2	0.0666667	22.5	0.008	0.123	1.008	1.123
0.001	60	10	2	0.0666667	22.5	-0.496	-0.0118	0.504	0.988237
0.01	60	10	2	0.0666667	22.5	-0.496	-0.0118	0.504	0.988237
0.1	60	10	2	0.0666667	22.5	0.512	0.0556	1.512	1.05562
0.2	60	10	2	0.0666667	22.5	1.52	0.46	2.52	1.4599
0.4	60	10	2	0.0666667	22.5	3.03	0.797	4.032	1.7968
0.6	60	10	2	0.0666667	22.5	5.8	1.61	6.804	2.60535
0.8	60	10	2	0.0666667	22.5	8.07	2.23	9.072	3.23423
1	60	10	2	0.0666667	22.5	13.4	2.21	14.364	3.21177
2	60	10	2	0.0666667	22.5	20.7	5.45	21.672	6.446
4	60	10	2	0.0666667	22.5	30.5	10.5	31.5	11.5444
0	60	10	2	0.0666667	45	0.512	0.19	1.512	1.19038
0.001	60	10	2	0.0666667	45	0.008	-0.191	1.008	0.808558
0.01	60	10	2	0.0666667	45	0.008	-0.147	1.008	0.853478
0.1	60	10	2	0.0666667	45	1.02	0.0556	2.016	1.05562
0.2	60	10	2	0.0666667	45	2.78	0.235	3.78	1.2353
0.4	60	10	2	0.0666667	45	2.78	0.729	3.78	1.72942
0.6	60	10	2	0.0666667	45	7.06	1.02	8.064	2.02139
0.8	60	10	2	0.0666667	45	8.32	1.76	9.324	2.76257
1	60	10	2	0.0666667	45	8.58	2.03	9.576	3.03209
2	60	10	2	0.0666667	45	19.7	4.48	20.664	5.48022
4	60	10	2	0.0666667	45	34.5	9.89	35.532	10.8931
0	60	10	2	0.116667	1	0.245	-0.169	1.24518	0.831018
0.001	60	10	2	0.116667	1	0.0376	0.0556	1.03765	1.05562
0.01	60	10	2	0.116667	1	0.245	0.123	1.24518	1.123
0.1	60	10	2	0.116667	1	1.28	0.437	2.28282	1.43744
0.2	60	10	2	0.116667	1	2.32	0.662	3.32047	1.66204
0.4	60	10	2	0.116667	1	4.4	1.22	5.39576	2.22353
0.6	60	10	2	0.116667	1	5.85	1.58	6.84847	2.58289
0.8	60	10	2	0.116667	1	8.55	2.08	9.54635	3.07701
1	60	10	2	0.116667	1	9.58	2.3	10.584	3.30161
2	60	10	2	0.116667	1	18.7	5.09	19.7153	6.08664
4	60	10	2	0.116667	1	29.5	10.3	30.5068	11.3198
0	60	10	2	0.116667	22.5	-0.585	0.0781	0.415059	1.07808
0.001	60	10	2	0.116667	22.5	0.66	0.19	1.66023	1.19038
0.01	60	10	2	0.116667	22.5	0.66	0.235	1.66023	1.2353
0.1	60	10	2	0.116667	22.5	1.08	0.415	2.07529	1.41498
0.2	60	10	2	0.116667	22.5	2.74	0.797	3.73553	1.7968
0.4	60	10	2	0.116667	22.5	4.19	1.04	5.18823	2.04385
0.6	60	10	2	0.116667	22.5	5.23	1.52	6.22588	2.51551
0.8	60	10	2	0.116667	22.5	8.34	1.9	9.33882	2.89733
1	60	10	2	0.116667	22.5	9.58	2.41	10.584	3.41391
2	60	10	2	0.116667	22.5	23.3	5.36	24.2809	6.35616
4	60	10	2	0.116667	22.5	30.1	10.8	31.1294	11.769
0	60	10	2	0.116667	45	0.0376	-0.0342	1.03765	0.965777
0.001	60	10	2	0.116667	45	0.868	0.0332	1.86776	1.03316
0.01	60	10	2	0.116667	45	0.868	0.0556	1.86776	1.05562
0.1	60	10	2	0.116667	45	0.245	0.101	1.24518	1.10054
0.2	60	10	2	0.116667	45	0.245	0.19	1.24518	1.19038
0.4	60	10	2	0.116667	45	1.08	0.482	2.07529	1.48236
0.6	60	10	2	0.116667	45	3.15	0.819	4.15059	1.81926
0.8	60	10	2	0.116667	45	6.06	1.2	7.056	2.20107
1	60	10	2	0.116667	45	10	2.3	10.9991	3.30161
2	60	10	2	0.116667	45	19.1	4.32	20.1303	5.32301
4	60	10	2	0.116667	45	24.3	9.65	25.3186	10.646
0	60	10	4	0.0166667	1	-0.0378	0.19	0.962182	1.19038
0.001	60	10	4	0.0166667	1	0.123	-0.236	1.12255	0.763638
0.01	60	10	4	0.0166667	1	0.123	-0.191	1.12255	0.808558
0.1	60	10	4	0.0166667	1	0.924	0.527	1.92436	1.52728
0.2	60	10	4	0.0166667	1	2.37	0.797	3.36764	1.7968
0.4	60	10	4	0.0166667	1	4.13	1.2	5.13163	2.20107
0.6	60	10	4	0.0166667	1	7.66	1.9	8.65963	2.89733
0.8	60	10	4	0.0166667	1	10.4	2.39	11.3858	3.39145
1	60	10	4	0.0166667	1	12.3	3.18	13.3102	4.17755
2	60	10	4	0.0166667	1	16.2	5.15	17.1589	6.15402
4	60	10	4	0.0166667	1	30.6	10.5	31.5916	11.477
0	60	10	4	0.0166667	22.5	0.443	-0.124	1.44327	0.875938
0.001	60	10	4	0.0166667	22.5	-0.0378	-0.0118	0.962182	0.988237
0.01	60	10	4	0.0166667	22.5	0.123	0.0107	1.12255	1.0107
0.1	60	10	4	0.0166667	22.5	-0.0378	0.0107	0.962182	1.0107
0.2	60	10	4	0.0166667	22.5	1.25	0.145	2.24509	1.14546
0.4	60	10	4	0.0166667	22.5	2.37	0.662	3.36764	1.66204
0.6	60	10	4	0.0166667	22.5	3.65	1.4	4.65054	2.40321
0.8	60	10	4	0.0166667	22.5	6.06	1.83	7.056	2.82995
1	60	10	4	0.0166667	22.5	7.5	2.28	8.49927	3.27915
2	60	10	4	0.0166667	22.5	20.2	6.07	21.168	7.07488
4	60	10	4	0.0166667	22.5	38	11.4	38.9684	12.3754
0	60	10	4	0.0166667	45	-0.0378	-0.214	0.962182	0.786098
0.001	60	10	4	0.0166667	45	0.604	0.235	1.60364	1.2353
0.01	60	10	4	0.0166667	45	0.604	0.258	1.60364	1.25776
0.1	60	10	4	0.0166667	45	0.604	0.46	1.60364	1.4599
0.2	60	10	4	0.0166667	45	1.89	0.684	2.88654	1.6845
0.4	60	10	4	0.0166667	45	3.97	1.16	4.97127	2.15615
0.6	60	10	4	0.0166667	45	3.01	0.662	4.00909	1.66204
0.8	60	10	4	0.0166667	45	4.29	1.18	5.292	2.17861
1	60	10	4	0.0166667	45	5.41	1.58	6.41454	2.58289
2	60	10	4	0.0166667	45	14.7	5.22	15.7156	6.2214
4	60	10	4	0.0166667	45	32.5	10.9	33.516	11.9262
0	60	10	4	0.0666667	1	0.764	0.168	1.764	1.16792
0.001	60	10	4	0.0666667	1	0.512	0.0332	1.512	1.03316
0.01	60	10	4	0.0666667	1	0.386	0.0556	1.386	1.05562
0.1	60	10	4	0.0666667	1	0.638	0.348	1.638	1.3476
0.2	60	10	4	0.0666667	1	0.764	0.46	1.764	1.4599
0.4	60	10	4	0.0666667	1	3.03	0.909	4.032	1.90909
0.6	60	10	4	0.0666667	1	4.92	2.12	5.922	3.12193
0.8	60	10	4	0.0666667	1	6.31	2.64	7.308	3.63851
1	60	10	4	0.0666667	1	7.19	3	8.19	3.99787
2	60	10	4	0.0666667	1	14.9	5.87	15.876	6.87274
4	60	10	4	0.0666667	1	26.1	10.7	27.09	11.7241
0	60	10	4	0.0666667	22.5	0.008	0.123	1.008	1.123
0.001	60	10	4	0.0666667	22.5	-0.244	-0.0118	0.756	0.988237
0.01	60	10	4	0.0666667	22.5	-0.37	-0.0118	0.63	0.988237
0.1	60	10	4	0.0666667	22.5	0.26	0.0556	1.26	1.05562
0.2	60	10	4	0.0666667	22.5	1.02	0.46	2.016	1.4599
0.4	60	10	4	0.0666667	22.5	1.65	0.797	2.646	1.7968
0.6	60	10	4	0.0666667	22.5	3.16	1.61	4.158	2.60535
0.8	60	10	4	0.0666667	22.5	4.67	2.23	5.67	3.23423
1	60	10	4	0.0666667	22.5	5.93	2.71	6.93	3.70589
2	60	10	4	0.0666667	22.5	12.4	5.45	13.356	6.446
4	60	10	4	0.0666667	22.5	23.6	10.5	24.57	11.5444
0	60	10	4	0.0666667	45	0.134	0.19	1.134	1.19038
0.001	60	10	4	0.0666667	45	0.008	-0.191	1.008	0.808558
0.01	60	10	4	0.0666667	45	0.008	-0.147	1.008	0.853478
0.1	60	10	4	0.0666667	45	1.27	0.0556	2.268	1.05562
0.2	60	10	4	0.0666667	45	1.52	0.235	2.52	1.2353
0.4	60	10	4	0.0666667	45	2.4	0.729	3.402	1.72942
0.6	60	10	4	0.0666667	45	3.54	1.02	4.536	2.02139
0.8	60	10	4	0.0666667	45	4.8	1.76	5.796	2.76257
1	60	10	4	0.0666667	45	6.06	2.39	7.056	3.39145
2	60	10	4	0.0666667	45	11	4.48	11.97	5.48022
4	60	10	4	0.0666667	45	25.3	9.89	26.334	10.8931
0	60	10	4	0.116667	1	0.349	-0.169	1.34894	0.831018
0.001	60	10	4	0.116667	1	-0.17	0.0556	0.830117	1.05562
0.01	60	10	4	0.116667	1	-0.17	0.123	0.830117	1.123
0.1	60	10	4	0.116667	1	0.453	0.437	1.45271	1.43744
0.2	60	10	4	0.116667	1	1.18	0.662	2.17906	1.66204
0.4	60	10	4	0.116667	1	2.01	1.22	3.00918	2.22353
0.6	60	10	4	0.116667	1	3.67	1.58	4.66941	2.58289
0.8	60	10	4	0.116667	1	5.23	2.08	6.22588	3.07701
1	60	10	4	0.116667	1	5.85	2.71	6.84847	3.70589
2	60	10	4	0.116667	1	10.6	5.09	11.6216	6.08664
4	60	10	4	0.116667	1	21.4	10.3	22.4132	11.3198
0	60	10	4	0.116667	22.5	-0.377	0.0781	0.622588	1.07808
0.001	60	10	4	0.116667	22.5	-0.0661	0.19	0.933882	1.19038
0.01	60	10	4	0.116667	22.5	0.141	0.235	1.14141	1.2353
0.1	60	10	4	0.116667	22.5	0.66	0.415	1.66023	1.41498
0.2	60	10	4	0.116667	22.5	1.8	0.797	2.80165	1.7968
0.4	60	10	4	0.116667	22.5	2.32	1.04	3.32047	2.04385
0.6	60	10	4	0.116667	22.5	2.74	1.52	3.73553	2.51551
0.8	60	10	4	0.116667	22.5	4.08	1.9	5.08447	2.89733
1	60	10	4	0.116667	22.5	5.54	2.62	6.53717	3.61605
2	60	10	4	0.116667	22.5	12.7	5.36	13.6969	6.35616
4	60	10	4	0.116667	22.5	21.7	10.8	22.7245	11.769
0	60	10	4	0.116667	45	0.453	-0.0342	1.45271	0.965777
0.001	60	10	4	0.116667	45	0.349	0.0332	1.34894	1.03316
0.01	60	10	4	0.116667	45	0.349	0.0556	1.34894	1.05562
0.1	60	10	4	0.116667	45	-0.17	0.101	0.830117	1.10054
0.2	60	10	4	0.116667	45	-0.17	0.19	0.830117	1.19038
0.4	60	10	4	0.116667	45	0.453	0.482	1.45271	1.48236
0.6	60	10	4	0.116667	45	1.49	0.819	2.49035	1.81926
0.8	60	10	4	0.116667	45	3.05	1.2	4.04682	2.20107
1	60	10	4	0.116667	45	4.19	1.65	5.18823	2.65027
2	60	10	4	0.116667	45	10.4	4.32	11.4141	5.32301
4	60	10	4	0.116667	45	18.4	9.65	19.404	10.646
0	60	10	5	0.0166667	1	0.155	-0.259	1.15462	0.741178
0.001	60	10	5	0.0166667	1	0.155	-0.236	1.15462	0.763638
0.01	60	10	5	0.0166667	1	0.283	-0.191	1.28291	0.808558
0.1	60	10	5	0.0166667	1	0.668	0.527	1.66778	1.52728
0.2	60	10	5	0.0166667	1	1.95	0.797	2.95069	1.7968
0.4	60	10	5	0.0166667	1	3.23	1.2	4.2336	2.20107
0.6	60	10	5	0.0166667	1	4	1.22	5.00334	2.22353
0.8	60	10	5	0.0166667	1	8.62	2.39	9.62181	3.39145
1	60	10	5	0.0166667	1	10.4	3.18	11.4179	4.17755
2	60	10	5	0.0166667	1	13.2	5.15	14.2403	6.15402
4	60	10	5	0.0166667	1	26.5	10.5	27.4542	11.477
0	60	10	5	0.0166667	22.5	0.0263	-0.0118	1.02633	0.988237
0.001	60	10	5	0.0166667	22.5	0.0263	-0.0118	1.02633	0.988237
0.01	60	10	5	0.0166667	22.5	0.0263	0.0107	1.02633	1.0107
0.1	60	10	5	0.0166667	22.5	-0.23	0.0107	0.769745	1.0107
0.2	60	10	5	0.0166667	22.5	0.796	0.145	1.79607	1.14546
0.4	60	10	5	0.0166667	22.5	1.82	0.662	2.8224	1.66204
0.6	60	10	5	0.0166667	22.5	4	1.31	5.00334	2.31337
0.8	60	10	5	0.0166667	22.5	4.9	1.83	5.90138	2.82995
1	60	10	5	0.0166667	22.5	6.57	2.28	7.56916	3.27915
2	60	10	5	0.0166667	22.5	17.1	6.07	18.089	7.07488
4	60	10	5	0.0166667	22.5	33.4	11.4	34.382	12.3754
0	60	10	5	0.0166667	45	0.283	0.235	1.28291	1.2353
0.001	60	10	5	0.0166667	45	0.283	0.235	1.28291	1.2353
0.01	60	10	5	0.0166667	45	0.283	0.258	1.28291	1.25776
0.1	60	10	5	0.0166667	45	0.539	0.46	1.53949	1.4599
0.2	60	10	5	0.0166667	45	1.69	0.684	2.69411	1.6845
0.4	60	10	5	0.0166667	45	3.23	1.16	4.2336	2.15615
0.6	60	10	5	0.0166667	45	3.75	1.38	4.74676	2.38075
0.8	60	10	5	0.0166667	45	3.75	1.18	4.74676	2.17861
1	60	10	5	0.0166667	45	4.64	1.58	5.6448	2.58289
2	60	10	5	0.0166667	45	12.7	5.22	13.7271	6.2214
4	60	10	5	0.0166667	45	27.7	10.9	28.7372	11.9262
0	60	10	5	0.0666667	1	0.512	0.0332	1.512	1.03316
0.001	60	10	5	0.0666667	1	0.411	0.0332	1.4112	1.03316
0.01	60	10	5	0.0666667	1	0.31	0.0556	1.3104	1.05562
0.1	60	10	5	0.0666667	1	0.411	0.348	1.4112	1.3476
0.2	60	10	5	0.0666667	1	0.915	0.46	1.9152	1.4599
0.4	60	10	5	0.0666667	1	2.83	0.909	3.8304	1.90909
0.6	60	10	5	0.0666667	1	3.94	1.9	4.9392	2.89733
0.8	60	10	5	0.0666667	1	5.25	2.64	6.2496	3.63851
1	60	10	5	0.0666667	1	5.96	3	6.9552	3.99787
2	60	10	5	0.0666667	1	12.5	5.87	13.5072	6.87274
4	60	10	5	0.0666667	1	22.3	10.7	23.2848	11.7241
0	60	10	5	0.0666667	22.5	-0.294	-0.0118	0.7056	0.988237
0.001	60	10	5	0.0666667	22.5	-0.294	-0.0118	0.7056	0.988237
0.01	60	10	5	0.0666667	22.5	-0.294	-0.0118	0.7056	0.988237
0.1	60	10	5	0.0666667	22.5	0.008	0.0556	1.008	1.05562
0.2	60	10	5	0.0666667	22.5	0.714	0.46	1.7136	1.4599
0.4	60	10	5	0.0666667	22.5	1.42	0.797	2.4192	1.7968
0.6	60	10	5	0.0666667	22.5	3.94	1.49	4.9392	2.49305
0.8	60	10	5	0.0666667	22.5	3.74	2.23	4.7376	3.23423
1	60	10	5	0.0666667	22.5	5.05	2.71	6.048	3.70589
2	60	10	5	0.0666667	22.5	10.7	5.45	11.6928	6.446
4	60	10	5	0.0666667	22.5	20.1	10.5	21.0672	11.5444
0	60	10	5	0.0666667	45	-0.0928	-0.191	0.9072	0.808558
0.001	60	10	5	0.0666667	45	-0.0928	-0.191	0.9072	0.808558
0.01	60	10	5	0.0666667	45	-0.0928	-0.147	0.9072	0.853478
0.1	60	10	5	0.0666667	45	0.814	0.0556	1.8144	1.05562
0.2	60	10	5	0.0666667	45	1.12	0.235	2.1168	1.2353
0.4	60	10	5	0.0666667	45	2.12	0.729	3.1248	1.72942
0.6	60	10	5	0.0666667	45	2.73	1.09	3.7296	2.08877
0.8	60	10	5	0.0666667	45	3.74	1.76	4.7376	2.76257
1	60	10	5	0.0666667	45	5.25	2.39	6.2496	3.39145
2	60	10	5	0.0666667	45	9.38	4.48	10.3824	5.48022
4	60	10	5	0.0666667	45	21.3	9.89	22.2768	10.8931
0	60	10	5	0.116667	1	-0.336	0.0556	0.664094	1.05562
0.001	60	10	5	0.116667	1	-0.336	0.0556	0.664094	1.05562
0.01	60	10	5	0.116667	1	-0.253	0.123	0.747106	1.123
0.1	60	10	5	0.116667	1	0.494	0.437	1.49421	1.43744
0.2	60	10	5	0.116667	1	0.909	0.662	1.90927	1.66204
0.4	60	10	5	0.116667	1	1.74	1.22	2.73939	2.22353
0.6	60	10	5	0.116667	1	3.23	1.38	4.2336	2.38075
0.8	60	10	5	0.116667	1	4.23	2.08	5.22974	3.07701
1	60	10	5	0.116667	1	4.64	2.71	5.6448	3.70589
2	60	10	5	0.116667	1	8.8	5.09	9.79539	6.08664
4	60	10	5	0.116667	1	18.1	10.3	19.0927	11.3198
0	60	10	5	0.116667	22.5	-0.0869	0.19	0.913129	1.19038
0.001	60	10	5	0.116667	22.5	-0.0869	0.19	0.913129	1.19038
0.01	60	10	5	0.116667	22.5	-0.00386	0.235	0.996141	1.2353
0.1	60	10	5	0.116667	22.5	0.66	0.415	1.66023	1.41498
0.2	60	10	5	0.116667	22.5	1.41	0.797	2.40734	1.7968
0.4	60	10	5	0.116667	22.5	1.82	1.04	2.8224	2.04385
0.6	60	10	5	0.116667	22.5	2.49	1.47	3.48649	2.47059
0.8	60	10	5	0.116667	22.5	3.48	1.9	4.48263	2.89733
1	60	10	5	0.116667	22.5	4.89	2.62	5.89383	3.61605
2	60	10	5	0.116667	22.5	10.4	5.36	11.3726	6.35616
4	60	10	5	0.116667	22.5	18	10.8	19.0097	11.769
0	60	10	5	0.116667	45	0.245	0.0332	1.24518	1.03316
0.001	60	10	5	0.116667	45	0.245	0.0332	1.24518	1.03316
0.01	60	10	5	0.116667	45	0.245	0.0556	1.24518	1.05562
0.1	60	10	5	0.116667	45	-0.336	0.101	0.664094	1.10054
0.2	60	10	5	0.116667	45	-0.17	0.19	0.830117	1.19038
0.4	60	10	5	0.116667	45	0.245	0.482	1.24518	1.48236
0.6	60	10	5	0.116667	45	2.82	1.22	3.81854	2.22353
0.8	60	10	5	0.116667	45	2.57	1.2	3.5695	2.20107
1	60	10	5	0.116667	45	3.32	1.65	4.31661	2.65027
2	60	10	5	0.116667	45	8.71	4.32	9.71237	5.32301
4	60	10	5	0.116667	45	16	9.65	17.0174	10.646
0	60	10	8	0.0166667	1	-0.0378	-0.259	0.962182	0.741178
0.001	60	10	8	0.0166667	1	-0.0378	-0.236	0.962182	0.763638
0.01	60	10	8	0.0166667	1	-0.0378	-0.191	0.962182	0.808558
0.1	60	10	8	0.0166667	1	0.684	0.527	1.68382	1.52728
0.2	60	10	8	0.0166667	1	1.49	0.797	2.48564	1.7968
0.4	60	10	8	0.0166667	1	2.21	1.2	3.20727	2.20107
0.6	60	10	8	0.0166667	1	4.29	1.9	5.292	2.89733
0.8	60	10	8	0.0166667	1	5.9	2.39	6.89563	3.39145
1	60	10	8	0.0166667	1	7.26	3.18	8.25872	4.17755
2	60	10	8	0.0166667	1	9.58	5.15	10.584	6.15402
4	60	10	8	0.0166667	1	21	10.5	21.9698	11.477
0	60	10	8	0.0166667	22.5	0.0424	-0.0118	1.04236	0.988237
0.001	60	10	8	0.0166667	22.5	0.0424	-0.0118	1.04236	0.988237
0.01	60	10	8	0.0166667	22.5	0.0424	0.0107	1.04236	1.0107
0.1	60	10	8	0.0166667	22.5	-0.0378	0.0107	0.962182	1.0107
0.2	60	10	8	0.0166667	22.5	0.604	0.145	1.60364	1.14546
0.4	60	10	8	0.0166667	22.5	1.57	0.662	2.56582	1.66204
0.6	60	10	8	0.0166667	22.5	1.97	1.4	2.96673	2.40321
0.8	60	10	8	0.0166667	22.5	3.81	1.83	4.81091	2.82995
1	60	10	8	0.0166667	22.5	4.45	2.28	5.45236	3.27915
2	60	10	8	0.0166667	22.5	12.4	6.07	13.3904	7.07488
4	60	10	8	0.0166667	22.5	24.1	11.4	25.0969	12.3754
0	60	10	8	0.0166667	45	0.0424	0.235	1.04236	1.2353
0.001	60	10	8	0.0166667	45	0.0424	0.235	1.04236	1.2353
0.01	60	10	8	0.0166667	45	0.123	0.258	1.12255	1.25776
0.1	60	10	8	0.0166667	45	0.844	0.46	1.84418	1.4599
0.2	60	10	8	0.0166667	45	1.16	0.684	2.16491	1.6845
0.4	60	10	8	0.0166667	45	2.37	1.16	3.36764	2.15615
0.6	60	10	8	0.0166667	45	1.97	0.662	2.96673	1.66204
0.8	60	10	8	0.0166667	45	2.85	1.18	3.84873	2.17861
1	60	10	8	0.0166667	45	3.41	1.58	4.41	2.58289
2	60	10	8	0.0166667	45	10.1	5.22	11.0651	6.2214
4	60	10	8	0.0166667	45	20.7	10.9	21.7293	11.9262
0	60	10	8	0.0666667	1	0.386	0.0332	1.386	1.03316
0.001	60	10	8	0.0666667	1	0.386	0.0332	1.386	1.03316
0.01	60	10	8	0.0666667	1	0.323	0.0556	1.323	1.05562
0.1	60	10	8	0.0666667	1	0.134	0.348	1.134	1.3476
0.2	60	10	8	0.0666667	1	0.512	0.46	1.512	1.4599
0.4	60	10	8	0.0666667	1	1.71	0.909	2.709	1.90909
0.6	60	10	8	0.0666667	1	2.78	2.12	3.78	3.12193
0.8	60	10	8	0.0666667	1	3.54	2.64	4.536	3.63851
1	60	10	8	0.0666667	1	4.35	3	5.355	3.99787
2	60	10	8	0.0666667	1	9.02	5.87	10.017	6.87274
4	60	10	8	0.0666667	1	16.4	10.7	17.388	11.7241
0	60	10	8	0.0666667	22.5	0.134	-0.0118	1.134	0.988237
0.001	60	10	8	0.0666667	22.5	0.134	-0.0118	1.134	0.988237
0.01	60	10	8	0.0666667	22.5	0.071	-0.0118	1.071	0.988237
0.1	60	10	8	0.0666667	22.5	-0.118	0.0556	0.882	1.05562
0.2	60	10	8	0.0666667	22.5	0.449	0.46	1.449	1.4599
0.4	60	10	8	0.0666667	22.5	0.953	0.797	1.953	1.7968
0.6	60	10	8	0.0666667	22.5	1.96	1.61	2.961	2.60535
0.8	60	10	8	0.0666667	22.5	3.03	2.23	4.032	3.23423
1	60	10	8	0.0666667	22.5	3.54	2.71	4.536	3.70589
2	60	10	8	0.0666667	22.5	7.76	5.45	8.757	6.446
4	60	10	8	0.0666667	22.5	14.8	10.5	15.813	11.5444
0	60	10	8	0.0666667	45	0.071	-0.191	1.071	0.808558
0.001	60	10	8	0.0666667	45	0.071	-0.191	1.071	0.808558
0.01	60	10	8	0.0666667	45	0.134	-0.147	1.134	0.853478
0.1	60	10	8	0.0666667	45	0.575	0.0556	1.575	1.05562
0.2	60	10	8	0.0666667	45	0.764	0.235	1.764	1.2353
0.4	60	10	8	0.0666667	45	1.2	0.729	2.205	1.72942
0.6	60	10	8	0.0666667	45	2.09	1.02	3.087	2.02139
0.8	60	10	8	0.0666667	45	2.97	1.76	3.969	2.76257
1	60	10	8	0.0666667	45	3.79	2.39	4.788	3.39145
2	60	10	8	0.0666667	45	6.75	4.48	7.749	5.48022
4	60	10	8	0.0666667	45	16.1	9.89	17.073	10.8931
0	60	10	8	0.116667	1	-0.222	0.0556	0.778235	1.05562
0.001	60	10	8	0.116667	1	-0.222	0.0556	0.778235	1.05562
0.01	60	10	8	0.116667	1	-0.17	0.123	0.830117	1.123
0.1	60	10	8	0.116667	1	0.141	0.437	1.14141	1.43744
0.2	60	10	8	0.116667	1	0.401	0.662	1.40082	1.66204
0.4	60	10	8	0.116667	1	1.02	1.22	2.02341	2.22353
0.6	60	10	8	0.116667	1	1.91	1.58	2.90541	2.58289
0.8	60	10	8	0.116667	1	2.74	2.08	3.73553	3.07701
1	60	10	8	0.116667	1	3.31	2.71	4.30623	3.70589
2	60	10	8	0.116667	1	6.42	5.09	7.41917	6.08664
4	60	10	8	0.116667	1	13.4	10.3	14.4233	11.3198
0	60	10	8	0.116667	22.5	-0.118	0.19	0.882	1.19038
0.001	60	10	8	0.116667	22.5	-0.118	0.19	0.882	1.19038
0.01	60	10	8	0.116667	22.5	-0.118	0.235	0.882	1.2353
0.1	60	10	8	0.116667	22.5	0.193	0.415	1.19329	1.41498
0.2	60	10	8	0.116667	22.5	0.608	0.797	1.60835	1.7968
0.4	60	10	8	0.116667	22.5	1.08	1.04	2.07529	2.04385
0.6	60	10	8	0.116667	22.5	1.65	1.52	2.646	2.51551
0.8	60	10	8	0.116667	22.5	2.53	1.9	3.528	2.89733
1	60	10	8	0.116667	22.5	3.2	2.62	4.20247	3.61605
2	60	10	8	0.116667	22.5	7.61	5.36	8.61247	6.35616
4	60	10	8	0.116667	22.5	14.4	10.8	15.4091	11.769
0	60	10	8	0.116667	45	0.349	0.0332	1.34894	1.03316
0.001	60	10	8	0.116667	45	0.349	0.0332	1.34894	1.03316
0.01	60	10	8	0.116667	45	0.349	0.0556	1.34894	1.05562
0.1	60	10	8	0.116667	45	-0.0142	0.101	0.985764	1.10054
0.2	60	10	8	0.116667	45	0.0376	0.19	1.03765	1.19038
0.4	60	10	8	0.116667	45	0.401	0.482	1.40082	1.48236
0.6	60	10	8	0.116667	45	0.92	0.819	1.91965	1.81926
0.8	60	10	8	0.116667	45	1.54	1.2	2.54223	2.20107
1	60	10	8	0.116667	45	2.16	1.65	3.16482	2.65027
2	60	10	8	0.116667	45	6.06	4.32	7.056	5.32301
4	60	10	8	0.116667	45	12.6	9.65	13.5932	10.646
0	60	10	10	0.0166667	1	-0.166	-0.259	0.833891	0.741178
0.001	60	10	10	0.0166667	1	-0.102	-0.236	0.898036	0.763638
0.01	60	10	10	0.0166667	1	-0.102	-0.191	0.898036	0.808558
0.1	60	10	10	0.0166667	1	0.604	0.527	1.60364	1.52728
0.2	60	10	10	0.0166667	1	1.25	0.797	2.24509	1.7968
0.4	60	10	10	0.0166667	1	1.95	1.2	2.95069	2.20107
0.6	60	10	10	0.0166667	1	3.68	1.9	4.68262	2.89733
0.8	60	10	10	0.0166667	1	5.16	2.39	6.15796	3.39145
1	60	10	10	0.0166667	1	6.31	3.18	7.31258	4.17755
2	60	10	10	0.0166667	1	8.43	5.15	9.42938	6.15402
4	60	10	10	0.0166667	1	18.1	10.5	19.0512	11.477
0	60	10	10	0.0166667	22.5	0.155	-0.0118	1.15462	0.988237
0.001	60	10	10	0.0166667	22.5	0.155	-0.0118	1.15462	0.988237
0.01	60	10	10	0.0166667	22.5	0.219	0.0107	1.21876	1.0107
0.1	60	10	10	0.0166667	22.5	-0.102	0.0107	0.898036	1.0107
0.2	60	10	10	0.0166667	22.5	0.475	0.145	1.47534	1.14546
0.4	60	10	10	0.0166667	22.5	1.31	0.662	2.30924	1.66204
0.6	60	10	10	0.0166667	22.5	1.69	1.4	2.69411	2.40321
0.8	60	10	10	0.0166667	22.5	3.23	1.83	4.2336	2.82995
1	60	10	10	0.0166667	22.5	4.07	2.28	5.06749	3.27915
2	60	10	10	0.0166667	22.5	11	6.07	11.9952	7.07488
4	60	10	10	0.0166667	22.5	20.7	11.4	21.6812	12.3754
0	60	10	10	0.0166667	45	-0.0378	0.235	0.962182	1.2353
0.001	60	10	10	0.0166667	45	-0.0378	0.235	0.962182	1.2353
0.01	60	10	10	0.0166667	45	-0.0378	0.258	0.962182	1.25776
0.1	60	10	10	0.0166667	45	0.732	0.46	1.73193	1.4599
0.2	60	10	10	0.0166667	45	1.18	0.684	2.18094	1.6845
0.4	60	10	10	0.0166667	45	2.14	1.16	3.14313	2.15615
0.6	60	10	10	0.0166667	45	1.69	0.662	2.69411	1.66204
0.8	60	10	10	0.0166667	45	2.34	1.18	3.33556	2.17861
1	60	10	10	0.0166667	45	2.91	1.58	3.91287	2.58289
2	60	10	10	0.0166667	45	8.69	5.22	9.68596	6.2214
4	60	10	10	0.0166667	45	18.3	10.9	19.3078	11.9262
0	60	10	10	0.0666667	1	0.21	0.0332	1.2096	1.03316
0.001	60	10	10	0.0666667	1	0.21	0.0332	1.2096	1.03316
0.01	60	10	10	0.0666667	1	0.159	0.0556	1.1592	1.05562
0.1	60	10	10	0.0666667	1	0.0584	0.348	1.0584	1.3476
0.2	60	10	10	0.0666667	1	0.462	0.46	1.4616	1.4599
0.4	60	10	10	0.0666667	1	1.37	0.909	2.3688	1.90909
0.6	60	10	10	0.0666667	1	2.02	2.12	3.024	3.12193
0.8	60	10	10	0.0666667	1	2.68	2.64	3.6792	3.63851
1	60	10	10	0.0666667	1	3.54	3	4.536	3.99787
2	60	10	10	0.0666667	1	7.52	5.87	8.5176	6.87274
4	60	10	10	0.0666667	1	14.4	10.7	15.372	11.7241
0	60	10	10	0.0666667	22.5	0.008	-0.0118	1.008	0.988237
0.001	60	10	10	0.0666667	22.5	0.008	-0.0118	1.008	0.988237
0.01	60	10	10	0.0666667	22.5	0.008	-0.0118	1.008	0.988237
0.1	60	10	10	0.0666667	22.5	-0.0424	0.0556	0.9576	1.05562
0.2	60	10	10	0.0666667	22.5	0.21	0.46	1.2096	1.4599
0.4	60	10	10	0.0666667	22.5	0.613	0.797	1.6128	1.7968
0.6	60	10	10	0.0666667	22.5	1.47	1.61	2.4696	2.60535
0.8	60	10	10	0.0666667	22.5	2.43	2.23	3.4272	3.23423
1	60	10	10	0.0666667	22.5	2.98	2.71	3.9816	3.70589
2	60	10	10	0.0666667	22.5	6.86	5.45	7.8624	6.446
4	60	10	10	0.0666667	22.5	13.3	10.5	14.2632	11.5444
0	60	10	10	0.0666667	45	0.109	-0.191	1.1088	0.808558
0.001	60	10	10	0.0666667	45	0.109	-0.191	1.1088	0.808558
0.01	60	10	10	0.0666667	45	0.109	-0.147	1.1088	0.853478
0.1	60	10	10	0.0666667	45	0.512	0.0556	1.512	1.05562
0.2	60	10	10	0.0666667	45	0.613	0.235	1.6128	1.2353
0.4	60	10	10	0.0666667	45	0.865	0.729	1.8648	1.72942
0.6	60	10	10	0.0666667	45	1.87	1.02	2.8728	2.02139
0.8	60	10	10	0.0666667	45	2.58	1.76	3.5784	2.76257
1	60	10	10	0.0666667	45	3.18	2.39	4.1832	3.39145
2	60	10	10	0.0666667	45	5.8	4.48	6.804	5.48022
4	60	10	10	0.0666667	45	14.1	9.89	15.0696	10.8931
0	60	10	10	0.116667	1	-0.128	0.0556	0.871623	1.05562
0.001	60	10	10	0.116667	1	-0.128	0.0556	0.871623	1.05562
0.01	60	10	10	0.116667	1	-0.0869	0.123	0.913129	1.123
0.1	60	10	10	0.116667	1	0.0376	0.437	1.03765	1.43744
0.2	60	10	10	0.116667	1	0.37	0.662	1.36969	1.66204
0.4	60	10	10	0.116667	1	0.909	1.22	1.90927	2.22353
0.6	60	10	10	0.116667	1	1.45	1.58	2.44885	2.58289
0.8	60	10	10	0.116667	1	2.24	2.08	3.23746	3.07701
1	60	10	10	0.116667	1	2.78	2.71	3.77703	3.70589
2	60	10	10	0.116667	1	5.56	5.09	6.55793	6.08664
4	60	10	10	0.116667	1	11.5	10.3	12.4518	11.3198
0	60	10	10	0.116667	22.5	-0.128	0.19	0.871623	1.19038
0.001	60	10	10	0.116667	22.5	-0.128	0.19	0.871623	1.19038
0.01	60	10	10	0.116667	22.5	-0.128	0.235	0.871623	1.2353
0.1	60	10	10	0.116667	22.5	0.204	0.415	1.20367	1.41498
0.2	60	10	10	0.116667	22.5	0.411	0.797	1.4112	1.7968
0.4	60	10	10	0.116667	22.5	0.868	1.04	1.86776	2.04385
0.6	60	10	10	0.116667	22.5	1.2	1.52	2.19981	2.51551
0.8	60	10	10	0.116667	22.5	1.99	1.9	2.98842	2.89733
1	60	10	10	0.116667	22.5	2.65	2.62	3.65252	3.61605
2	60	10	10	0.116667	22.5	6.89	5.36	7.88612	6.35616
4	60	10	10	0.116667	22.5	12.5	10.8	13.5309	11.769
0	60	10	10	0.116667	45	0.37	0.0332	1.36969	1.03316
0.001	60	10	10	0.116667	45	0.37	0.0332	1.36969	1.03316
0.01	60	10	10	0.116667	45	0.37	0.0556	1.36969	1.05562
0.1	60	10	10	0.116667	45	-0.128	0.101	0.871623	1.10054
0.2	60	10	10	0.116667	45	-0.0454	0.19	0.954635	1.19038
0.4	60	10	10	0.116667	45	0.204	0.482	1.20367	1.48236
0.6	60	10	10	0.116667	45	0.702	0.819	1.70174	1.81926
0.8	60	10	10	0.116667	45	1.24	1.2	2.24132	2.20107
1	60	10	10	0.116667	45	1.66	1.65	2.65638	2.65027
2	60	10	10	0.116667	45	5.27	4.32	6.26739	5.32301
4	60	10	10	0.116667	45	10.9	9.65	11.9122	10.646
0	60	10	20	0.0166667	1	-0.294	-0.259	0.7056	0.741178
0.001	60	10	20	0.0166667	1	-0.294	-0.236	0.7056	0.763638
0.01	60	10	20	0.0166667	1	-0.23	-0.191	0.769745	0.808558
0.1	60	10	20	0.0166667	1	0.379	0.527	1.37913	1.52728
0.2	60	10	20	0.0166667	1	0.764	0.797	1.764	1.7968
0.6	60	10	20	0.0166667	1	2.34	1.9	3.33556	2.89733
0.8	60	10	20	0.0166667	1	3.11	2.39	4.10531	3.39145
1	60	10	20	0.0166667	1	4.07	3.18	5.06749	4.17755
2	60	10	20	0.0166667	1	5.8	5.15	6.79942	6.15402
4	60	10	20	0.0166667	1	12.3	10.5	13.3423	11.477
0	60	10	20	0.0166667	22.5	-0.0699	-0.0118	0.930109	0.988237
0.001	60	10	20	0.0166667	22.5	-0.0699	-0.0118	0.930109	0.988237
0.01	60	10	20	0.0166667	22.5	-0.0699	0.0107	0.930109	1.0107
0.1	60	10	20	0.0166667	22.5	-0.134	0.0107	0.865963	1.0107
0.2	60	10	20	0.0166667	22.5	0.187	0.145	1.18669	1.14546
0.6	60	10	20	0.0166667	22.5	1.18	1.4	2.18094	2.40321
0.8	60	10	20	0.0166667	22.5	1.95	1.83	2.95069	2.82995
1	60	10	20	0.0166667	22.5	2.46	2.28	3.46385	3.27915
2	60	10	20	0.0166667	22.5	7.4	6.07	8.40305	7.07488
4	60	10	20	0.0166667	22.5	13.9	11.4	14.9138	12.3754
0	60	10	20	0.0166667	45	-0.0699	0.235	0.930109	1.2353
0.001	60	10	20	0.0166667	45	-0.0699	0.235	0.930109	1.2353
0.01	60	10	20	0.0166667	45	-0.0699	0.258	0.930109	1.25776
0.1	60	10	20	0.0166667	45	0.411	0.46	1.4112	1.4599
0.2	60	10	20	0.0166667	45	0.7	0.684	1.69985	1.6845
0.6	60	10	20	0.0166667	45	0.732	0.662	1.73193	1.66204
0.8	60	10	20	0.0166667	45	1.18	1.18	2.18094	2.17861
1	60	10	20	0.0166667	45	1.57	1.58	2.56582	2.58289
2	60	10	20	0.0166667	45	5.8	5.22	6.79942	6.2214
4	60	10	20	0.0166667	45	13	10.9	13.9516	11.9262
0	60	10	20	0.0666667	1	-0.143	0.0332	0.8568	1.03316
0.001	60	10	20	0.0666667	1	-0.143	0.0332	0.8568	1.03316
0.01	60	10	20	0.0666667	1	-0.168	0.0556	0.8316	1.05562
0.1	60	10	20	0.0666667	1	-0.168	0.348	0.8316	1.3476
0.2	60	10	20	0.0666667	1	0.008	0.46	1.008	1.4599
0.6	60	10	20	0.0666667	1	1.24	2.12	2.2428	3.12193
0.8	60	10	20	0.0666667	1	1.6	2.64	2.5956	3.63851
1	60	10	20	0.0666667	1	2.28	3	3.276	3.99787
2	60	10	20	0.0666667	1	4.9	5.87	5.8968	6.87274
4	60	10	20	0.0666667	1	9.38	10.7	10.3824	11.7241
0	60	10	20	0.0666667	22.5	-0.168	-0.0118	0.8316	0.988237
0.001	60	10	20	0.0666667	22.5	-0.168	-0.0118	0.8316	0.988237
0.01	60	10	20	0.0666667	22.5	-0.194	-0.0118	0.8064	0.988237
0.1	60	10	20	0.0666667	22.5	-0.269	0.0556	0.7308	1.05562
0.2	60	10	20	0.0666667	22.5	-0.0676	0.46	0.9324	1.4599
0.6	60	10	20	0.0666667	22.5	0.991	1.61	1.9908	2.60535
0.8	60	10	20	0.0666667	22.5	1.65	2.23	2.646	3.23423
1	60	10	20	0.0666667	22.5	2.2	2.71	3.2004	3.70589
2	60	10	20	0.0666667	22.5	4.39	5.45	5.3928	6.446
4	60	10	20	0.0666667	22.5	9.68	10.5	10.6848	11.5444
0	60	10	20	0.0666667	45	-0.269	-0.191	0.7308	0.808558
0.001	60	10	20	0.0666667	45	-0.269	-0.191	0.7308	0.808558
0.01	60	10	20	0.0666667	45	-0.269	-0.147	0.7308	0.853478
0.1	60	10	20	0.0666667	45	-0.0928	0.0556	0.9072	1.05562
0.2	60	10	20	0.0666667	45	0.008	0.235	1.008	1.2353
0.6	60	10	20	0.0666667	45	0.915	1.02	1.9152	2.02139
0.8	60	10	20	0.0666667	45	1.32	1.76	2.3184	2.76257
1	60	10	20	0.0666667	45	1.72	2.39	2.7216	3.39145
2	60	10	20	0.0666667	45	3.74	4.48	4.7376	5.48022
4	60	10	20	0.0666667	45	8.85	9.89	9.8532	10.8931
0	60	10	20	0.116667	1	-0.0869	0.0556	0.913129	1.05562
0.001	60	10	20	0.116667	1	-0.0869	0.0556	0.913129	1.05562
0.01	60	10	20	0.116667	1	-0.0869	0.123	0.913129	1.123
0.1	60	10	20	0.116667	1	-0.253	0.437	0.747106	1.43744
0.2	60	10	20	0.116667	1	-0.191	0.662	0.809364	1.66204
0.6	60	10	20	0.116667	1	0.847	1.58	1.84701	2.58289
0.8	60	10	20	0.116667	1	1.41	2.08	2.40734	3.07701
1	60	10	20	0.116667	1	1.8	2.71	2.80165	3.70589
2	60	10	20	0.116667	1	3.5	5.09	4.50339	6.08664
4	60	10	20	0.116667	1	7.45	10.3	8.44644	11.3198
0	60	10	20	0.116667	22.5	-0.0869	0.19	0.913129	1.19038
0.001	60	10	20	0.116667	22.5	-0.0869	0.19	0.913129	1.19038
0.01	60	10	20	0.116667	22.5	-0.0869	0.235	0.913129	1.2353
0.1	60	10	20	0.116667	22.5	-0.17	0.415	0.830117	1.41498
0.2	60	10	20	0.116667	22.5	-0.0454	0.797	0.954635	1.7968
0.6	60	10	20	0.116667	22.5	0.515	1.52	1.51496	2.51551
0.8	60	10	20	0.116667	22.5	0.992	1.9	1.99228	2.89733
1	60	10	20	0.116667	22.5	1.66	2.62	2.65638	3.61605
2	60	10	20	0.116667	22.5	4.04	5.36	5.04296	6.35616
4	60	10	20	0.116667	22.5	7.9	10.8	8.90301	11.769
0	60	10	20	0.116667	45	0.0584	0.0332	1.0584	1.03316
0.001	60	10	20	0.116667	45	0.0584	0.0332	1.0584	1.03316
0.01	60	10	20	0.116667	45	0.0792	0.0556	1.07915	1.05562
0.1	60	10	20	0.116667	45	-0.315	0.101	0.684847	1.10054
0.2	60	10	20	0.116667	45	-0.274	0.19	0.726353	1.19038
0.6	60	10	20	0.116667	45	0.162	0.819	1.16216	1.81926
0.8	60	10	20	0.116667	45	0.515	1.2	1.51496	2.20107
1	60	10	20	0.116667	45	0.826	1.65	1.82626	2.65027
2	60	10	20	0.116667	45	3.3	4.32	4.29586	5.32301
4	60	10	20	0.116667	45	7.47	9.65	8.4672	10.646
0	60	20	1	0.0166667	1	0.008	0.0725	1.008	1.07246
0.001	60	20	1	0.0166667	1	0.008	0.0668	1.008	1.06685
0.01	60	20	1	0.0166667	1	0.344	0.0837	1.344	1.08369
0.1	60	20	1	0.0166667	1	1.69	0.0668	2.688	1.06685
0.2	60	20	1	0.0166667	1	5.72	0.101	6.72	1.10054
0.4	60	20	1	0.0166667	1	11.4	0.308	12.432	1.30829
0.4	60	20	1	0.0166667	1	11.4	0.308	12.432	1.30829
0.6	60	20	1	0.0166667	1	20.2	0.64	21.168	1.63958
0.8	60	20	1	0.0166667	1	24.2	0.892	25.2	1.89225
1	60	20	1	0.0166667	1	31.6	1.43	32.592	2.43129
2	60	20	1	0.0166667	1	44.7	2.84	45.696	3.83503
4	60	20	1	0.0166667	1	44.4	5.79	45.36	6.79413
0	60	20	1	0.0166667	22.5	-0.328	-0.0679	0.672	0.932087
0.001	60	20	1	0.0166667	22.5	-0.328	-0.0679	0.672	0.932087
0.01	60	20	1	0.0166667	22.5	0.008	-0.0511	1.008	0.948932
0.1	60	20	1	0.0166667	22.5	2.7	0.0837	3.696	1.08369
0.2	60	20	1	0.0166667	22.5	4.38	0.162	5.376	1.1623
0.4	60	20	1	0.0166667	22.5	8.74	0.353	9.744	1.35321
0.4	60	20	1	0.0166667	22.5	8.74	0.353	9.744	1.35321
0.6	60	20	1	0.0166667	22.5	18.2	0.78	19.152	1.77995
0.8	60	20	1	0.0166667	22.5	22.2	1.09	23.184	2.09439
1	60	20	1	0.0166667	22.5	26.9	1.26	27.888	2.26284
2	60	20	1	0.0166667	22.5	37.3	2.54	38.304	3.53744
4	60	20	1	0.0166667	22.5	51.4	5.45	52.416	6.446
0	60	20	1	0.0166667	45	-0.328	-0.0455	0.672	0.954547
0.001	60	20	1	0.0166667	45	-0.328	-0.0511	0.672	0.948932
0.01	60	20	1	0.0166667	45	-0.328	-0.0455	0.672	0.954547
0.1	60	20	1	0.0166667	45	2.36	0.0893	3.36	1.08931
0.2	60	20	1	0.0166667	45	4.71	0.325	5.712	1.32514
0.4	60	20	1	0.0166667	45	11.4	0.516	12.432	1.51605
0.4	60	20	1	0.0166667	45	11.4	0.516	12.432	1.51605
0.6	60	20	1	0.0166667	45	11.8	0.567	12.768	1.56658
0.8	60	20	1	0.0166667	45	17.5	0.757	18.48	1.75749
1	60	20	1	0.0166667	45	26.2	1.16	27.216	2.16177
2	60	20	1	0.0166667	45	36	2.33	36.96	3.32969
4	60	20	1	0.0166667	45	49.4	4.61	50.4	5.60937
0	60	20	1	0.0666667	1	0.176	-0.0455	1.176	0.954547
0.001	60	20	1	0.0666667	1	0.176	-0.0455	1.176	0.954547
0.01	60	20	1	0.0666667	1	0.47	-0.0398	1.47	0.960162
0.1	60	20	1	0.0666667	1	2.82	0.0781	3.822	1.07808
0.2	60	20	1	0.0666667	1	4.29	0.213	5.292	1.21284
0.4	60	20	1	0.0666667	1	7.23	0.454	8.232	1.45428
0.4	60	20	1	0.0666667	1	7.23	0.454	8.232	1.45428
0.6	60	20	1	0.0666667	1	18.7	0.808	19.698	1.80803
0.8	60	20	1	0.0666667	1	21.9	1.06	22.932	2.0607
1	60	20	1	0.0666667	1	29.9	1.52	30.87	2.52113
2	60	20	1	0.0666667	1	40.5	2.59	41.454	3.58798
4	60	20	1	0.0666667	1	40.5	5.18	41.454	6.17648
0	60	20	1	0.0666667	22.5	-0.412	0.0107	0.588	1.0107
0.001	60	20	1	0.0666667	22.5	-0.118	0.0163	0.882	1.01631
0.01	60	20	1	0.0666667	22.5	0.764	0.0275	1.764	1.02754
0.1	60	20	1	0.0666667	22.5	2.53	0.162	3.528	1.1623
0.2	60	20	1	0.0666667	22.5	5.17	0.314	6.174	1.31391
0.4	60	20	1	0.0666667	22.5	10.8	0.527	11.76	1.52728
0.4	60	20	1	0.0666667	22.5	10.8	0.527	11.76	1.52728
0.6	60	20	1	0.0666667	22.5	16.1	0.713	17.052	1.71257
0.8	60	20	1	0.0666667	22.5	19.3	1.03	20.286	2.02701
1	60	20	1	0.0666667	22.5	23.4	1.43	24.402	2.42567
2	60	20	1	0.0666667	22.5	35.7	2.67	36.75	3.6722
4	60	20	1	0.0666667	22.5	41.9	5.22	42.924	6.2214
0	60	20	1	0.0666667	45	-0.412	-0.0174	0.588	0.982622
0.001	60	20	1	0.0666667	45	-0.118	-0.0174	0.882	0.982622
0.01	60	20	1	0.0666667	45	-0.118	-0.0174	0.882	0.982622
0.1	60	20	1	0.0666667	45	2.82	0.235	3.822	1.2353
0.2	60	20	1	0.0666667	45	2.23	0.134	3.234	1.13423
0.4	60	20	1	0.0666667	45	5.17	0.348	6.174	1.3476
0.4	60	20	1	0.0666667	45	5.17	0.348	6.174	1.3476
0.6	60	20	1	0.0666667	45	14	0.606	14.994	1.60589
0.8	60	20	1	0.0666667	45	15.5	0.859	16.464	1.85856
1	60	20	1	0.0666667	45	14.6	0.808	15.582	1.80803
2	60	20	1	0.0666667	45	31	1.93	32.046	2.92541
4	60	20	1	0.0666667	45	41	4.21	42.042	5.21071
0	60	20	1	0.116667	1	1.35	-0.0286	2.352	0.971392
0.001	60	20	1	0.116667	1	1.09	-0.00615	2.09067	0.993852
0.01	60	20	1	0.116667	1	1.35	-0.000533	2.352	0.999467
0.1	60	20	1	0.116667	1	2.14	0.179	3.136	1.17915
0.2	60	20	1	0.116667	1	4.23	0.348	5.22666	1.3476
0.4	60	20	1	0.116667	1	7.62	0.662	8.624	1.66204
0.4	60	20	1	0.116667	1	7.62	0.662	8.624	1.66204
0.6	60	20	1	0.116667	1	14.7	0.83	15.68	1.83048
0.8	60	20	1	0.116667	1	21	1.14	21.952	2.13931
1	60	20	1	0.116667	1	29.1	1.54	30.0533	2.54359
2	60	20	1	0.116667	1	37.7	2.91	38.6773	3.90803
4	60	20	1	0.116667	1	35.6	5.73	36.5867	6.73237
0	60	20	1	0.116667	22.5	0.0453	0.0556	1.04533	1.05562
0.001	60	20	1	0.116667	22.5	0.0453	0.0612	1.04533	1.06123
0.01	60	20	1	0.116667	22.5	0.0453	0.0725	1.04533	1.07246
0.1	60	20	1	0.116667	22.5	1.87	0.0388	2.87467	1.03877
0.2	60	20	1	0.116667	22.5	5.01	0.241	6.01066	1.24091
0.4	60	20	1	0.116667	22.5	10.5	0.471	11.4987	1.47113
0.4	60	20	1	0.116667	22.5	10.5	0.471	11.4987	1.47113
0.6	60	20	1	0.116667	22.5	13.4	0.684	14.3733	1.6845
0.8	60	20	1	0.116667	22.5	15.2	0.903	16.2027	1.90348
1	60	20	1	0.116667	22.5	18.3	1.35	19.3387	2.34706
2	60	20	1	0.116667	22.5	34	2.58	35.0187	3.58236
4	60	20	1	0.116667	22.5	36.1	5.2	37.1093	6.20456
0	60	20	1	0.116667	45	1.09	0.0388	2.09067	1.03877
0.001	60	20	1	0.116667	45	0.829	0.05	1.82933	1.05
0.01	60	20	1	0.116667	45	0.568	0.0668	1.568	1.06685
0.1	60	20	1	0.116667	45	2.4	-0.00615	3.39733	0.993852
0.2	60	20	1	0.116667	45	3.7	0.0837	4.704	1.08369
0.4	60	20	1	0.116667	45	7.62	0.258	8.624	1.25776
0.4	60	20	1	0.116667	45	7.62	0.258	8.624	1.25776
0.6	60	20	1	0.116667	45	7.62	0.522	8.624	1.52166
0.8	60	20	1	0.116667	45	12.1	0.718	13.0667	1.71819
1	60	20	1	0.116667	45	18.9	1.07	19.8613	2.07193
2	60	20	1	0.116667	45	30.6	2.27	31.6213	3.27354
4	60	20	1	0.116667	45	39.8	4.94	40.768	5.94065
0	60	20	2	0.0166667	1	-0.496	-0.0848	0.504	0.915242
0.001	60	20	2	0.0166667	1	-0.328	0.0668	0.672	1.06685
0.01	60	20	2	0.0166667	1	-0.328	0.0837	0.672	1.08369
0.1	60	20	2	0.0166667	1	1.02	-0.0735	2.016	0.926473
0.2	60	20	2	0.0166667	1	3.03	0.101	4.032	1.10054
0.4	60	20	2	0.0166667	1	5.38	0.308	6.384	1.30829
0.6	60	20	2	0.0166667	1	9.92	0.64	10.92	1.63958
0.8	60	20	2	0.0166667	1	12.1	0.892	13.104	1.89225
1	60	20	2	0.0166667	1	17.1	1.43	18.144	2.43129
2	60	20	2	0.0166667	1	31.3	2.84	32.256	3.83503
4	60	20	2	0.0166667	1	41.7	5.79	42.672	6.79413
0	60	20	2	0.0166667	22.5	-0.328	-0.0342	0.672	0.965777
0.001	60	20	2	0.0166667	22.5	-0.16	-0.0679	0.84	0.932087
0.01	60	20	2	0.0166667	22.5	0.008	-0.0511	1.008	0.948932
0.1	60	20	2	0.0166667	22.5	1.69	-0.00615	2.688	0.993852
0.2	60	20	2	0.0166667	22.5	2.53	0.162	3.528	1.1623
0.4	60	20	2	0.0166667	22.5	4.54	0.353	5.544	1.35321
0.6	60	20	2	0.0166667	22.5	9.75	0.78	10.752	1.77995
0.8	60	20	2	0.0166667	22.5	11.8	1.09	12.768	2.09439
1	60	20	2	0.0166667	22.5	14.8	1.26	15.792	2.26284
2	60	20	2	0.0166667	22.5	26	2.54	27.048	3.53744
4	60	20	2	0.0166667	22.5	42	5.45	43.008	6.446
0	60	20	2	0.0166667	45	0.176	-0.0567	1.176	0.943317
0.001	60	20	2	0.0166667	45	-0.16	-0.0511	0.84	0.948932
0.01	60	20	2	0.0166667	45	0.008	-0.0455	1.008	0.954547
0.1	60	20	2	0.0166667	45	1.18	0.258	2.184	1.25776
0.2	60	20	2	0.0166667	45	2.53	0.325	3.528	1.32514
0.4	60	20	2	0.0166667	45	6.22	0.516	7.224	1.51605
0.6	60	20	2	0.0166667	45	6.06	0.567	7.056	1.56658
0.8	60	20	2	0.0166667	45	9.42	0.757	10.416	1.75749
1	60	20	2	0.0166667	45	13.6	1.16	14.616	2.16177
2	60	20	2	0.0166667	45	25.7	2.33	26.712	3.32969
4	60	20	2	0.0166667	45	40.8	4.61	41.832	5.60937
0	60	20	2	0.0666667	1	0.029	-0.0735	1.029	0.926473
0.001	60	20	2	0.0666667	1	0.029	-0.0455	1.029	0.954547
0.01	60	20	2	0.0666667	1	0.029	-0.0398	1.029	0.960162
0.1	60	20	2	0.0666667	1	0.764	0.0444	1.764	1.04439
0.2	60	20	2	0.0666667	1	1.79	0.213	2.793	1.21284
0.4	60	20	2	0.0666667	1	3.56	0.454	4.557	1.45428
0.6	60	20	2	0.0666667	1	9.29	0.808	10.29	1.80803
0.8	60	20	2	0.0666667	1	11.3	1.06	12.348	2.0607
1	60	20	2	0.0666667	1	15.5	1.52	16.464	2.52113
2	60	20	2	0.0666667	1	26.6	2.59	27.636	3.58798
4	60	20	2	0.0666667	1	36.3	5.18	37.338	6.17648
0	60	20	2	0.0666667	22.5	-0.118	-0.000533	0.882	0.999467
0.001	60	20	2	0.0666667	22.5	0.323	0.0163	1.323	1.01631
0.01	60	20	2	0.0666667	22.5	0.47	0.0275	1.47	1.02754
0.1	60	20	2	0.0666667	22.5	1.65	0.174	2.646	1.17353
0.2	60	20	2	0.0666667	22.5	2.67	0.314	3.675	1.31391
0.4	60	20	2	0.0666667	22.5	5.76	0.527	6.762	1.52728
0.6	60	20	2	0.0666667	22.5	8.26	0.713	9.261	1.71257
0.8	60	20	2	0.0666667	22.5	10	1.03	11.025	2.02701
1	60	20	2	0.0666667	22.5	12.1	1.43	13.083	2.42567
2	60	20	2	0.0666667	22.5	23.7	2.67	24.696	3.6722
4	60	20	2	0.0666667	22.5	35.9	5.22	36.897	6.2214
0	60	20	2	0.0666667	45	0.176	0.129	1.176	1.12861
0.001	60	20	2	0.0666667	45	-0.118	-0.0174	0.882	0.982622
0.01	60	20	2	0.0666667	45	0.029	-0.0174	1.029	0.982622
0.1	60	20	2	0.0666667	45	-0.118	0.0332	0.882	1.03316
0.2	60	20	2	0.0666667	45	1.06	0.134	2.058	1.13423
0.4	60	20	2	0.0666667	45	2.67	0.348	3.675	1.3476
0.6	60	20	2	0.0666667	45	6.64	0.606	7.644	1.60589
0.8	60	20	2	0.0666667	45	7.82	0.859	8.82	1.85856
1	60	20	2	0.0666667	45	7.82	0.808	8.82	1.80803
2	60	20	2	0.0666667	45	20.3	1.93	21.315	2.92541
4	60	20	2	0.0666667	45	31.2	4.21	32.193	5.21071
0	60	20	2	0.116667	1	0.437	0.0444	1.43733	1.04439
0.001	60	20	2	0.116667	1	0.307	-0.00615	1.30667	0.993852
0.01	60	20	2	0.116667	1	0.307	-0.000533	1.30667	0.999467
0.1	60	20	2	0.116667	1	0.699	0.213	1.69867	1.21284
0.2	60	20	2	0.116667	1	2.01	0.348	3.00533	1.3476
0.4	60	20	2	0.116667	1	3.97	0.662	4.96533	1.66204
0.6	60	20	2	0.116667	1	8.02	0.83	9.016	1.83048
0.8	60	20	2	0.116667	1	11	1.14	12.0213	2.13931
1	60	20	2	0.116667	1	15.1	1.54	16.072	2.54359
2	60	20	2	0.116667	1	25.5	2.91	26.5253	3.90803
4	60	20	2	0.116667	1	33	5.73	33.9733	6.73237
0	60	20	2	0.116667	22.5	-0.216	-0.0735	0.784	0.926473
0.001	60	20	2	0.116667	22.5	-0.347	0.0612	0.653333	1.06123
0.01	60	20	2	0.116667	22.5	-0.347	0.0725	0.653333	1.07246
0.1	60	20	2	0.116667	22.5	0.568	0.123	1.568	1.123
0.2	60	20	2	0.116667	22.5	2.4	0.241	3.39733	1.24091
0.4	60	20	2	0.116667	22.5	5.4	0.471	6.40266	1.47113
0.6	60	20	2	0.116667	22.5	7.1	0.684	8.10133	1.6845
0.8	60	20	2	0.116667	22.5	7.89	0.903	8.88533	1.90348
1	60	20	2	0.116667	22.5	9.45	1.35	10.4533	2.34706
2	60	20	2	0.116667	22.5	22.7	2.58	23.6507	3.58236
4	60	20	2	0.116667	22.5	32.6	5.2	33.5813	6.20456
0	60	20	2	0.116667	45	0.176	-0.0735	1.176	0.926473
0.001	60	20	2	0.116667	45	0.0453	0.05	1.04533	1.05
0.01	60	20	2	0.116667	45	0.0453	0.0668	1.04533	1.06685
0.1	60	20	2	0.116667	45	0.829	-0.00615	1.82933	0.993852
0.2	60	20	2	0.116667	45	1.48	0.0837	2.48267	1.08369
0.4	60	20	2	0.116667	45	3.57	0.258	4.57333	1.25776
0.6	60	20	2	0.116667	45	3.83	0.522	4.83467	1.52166
0.8	60	20	2	0.116667	45	6.58	0.718	7.57866	1.71819
1	60	20	2	0.116667	45	9.19	1.07	10.192	2.07193
2	60	20	2	0.116667	45	19.1	2.27	20.1227	3.27354
4	60	20	2	0.116667	45	30.2	4.94	31.2293	5.94065
0	60	20	4	0.0166667	1	-0.16	-0.0848	0.84	0.915242
0.001	60	20	4	0.0166667	1	-0.328	0.0668	0.672	1.06685
0.01	60	20	4	0.0166667	1	-0.328	0.0837	0.672	1.08369
0.1	60	20	4	0.0166667	1	0.26	-0.0735	1.26	0.926473
0.2	60	20	4	0.0166667	1	1.18	0.101	2.184	1.10054
0.4	60	20	4	0.0166667	1	2.7	0.308	3.696	1.30829
0.6	60	20	4	0.0166667	1	5.3	0.64	6.3	1.63958
0.8	60	20	4	0.0166667	1	6.81	0.892	7.812	1.89225
1	60	20	4	0.0166667	1	7.4	1.1	8.4	2.1
2	60	20	4	0.0166667	1	17.1	2.84	18.144	3.83503
4	60	20	4	0.0166667	1	31.5	5.79	32.508	6.79413
0	60	20	4	0.0166667	22.5	0.008	-0.0342	1.008	0.965777
0.001	60	20	4	0.0166667	22.5	-0.412	-0.0679	0.588	0.932087
0.01	60	20	4	0.0166667	22.5	-0.412	-0.0511	0.588	0.948932
0.1	60	20	4	0.0166667	22.5	0.68	-0.00615	1.68	0.993852
0.2	60	20	4	0.0166667	22.5	1.18	0.162	2.184	1.1623
0.4	60	20	4	0.0166667	22.5	2.7	0.353	3.696	1.35321
0.6	60	20	4	0.0166667	22.5	5.38	0.78	6.384	1.77995
0.8	60	20	4	0.0166667	22.5	6.56	1.09	7.56	2.09439
1	60	20	4	0.0166667	22.5	7.99	1.39	8.988	2.39198
2	60	20	4	0.0166667	22.5	15.1	2.54	16.128	3.53744
4	60	20	4	0.0166667	22.5	30.6	5.45	31.584	6.446
0	60	20	4	0.0166667	45	0.092	-0.0567	1.092	0.943317
0.001	60	20	4	0.0166667	45	-0.076	-0.0511	0.924	0.948932
0.01	60	20	4	0.0166667	45	-0.076	-0.0455	0.924	0.954547
0.1	60	20	4	0.0166667	45	0.596	0.258	1.596	1.25776
0.2	60	20	4	0.0166667	45	1.44	0.325	2.436	1.32514
0.4	60	20	4	0.0166667	45	3.54	0.516	4.536	1.51605
0.6	60	20	4	0.0166667	45	3.2	0.567	4.2	1.56658
0.8	60	20	4	0.0166667	45	5.05	0.757	6.048	1.75749
1	60	20	4	0.0166667	45	5.89	0.965	6.888	1.96524
2	60	20	4	0.0166667	45	14.5	2.33	15.54	3.32969
4	60	20	4	0.0166667	45	28.6	4.61	29.568	5.60937
0	60	20	4	0.0666667	1	0.029	-0.0735	1.029	0.926473
0.001	60	20	4	0.0666667	1	-0.192	-0.0455	0.8085	0.954547
0.01	60	20	4	0.0666667	1	-0.192	-0.0398	0.8085	0.960162
0.1	60	20	4	0.0666667	1	0.396	0.0444	1.3965	1.04439
0.2	60	20	4	0.0666667	1	1.06	0.213	2.058	1.21284
0.4	60	20	4	0.0666667	1	1.79	0.454	2.793	1.45428
0.6	60	20	4	0.0666667	1	5.03	0.808	6.027	1.80803
0.8	60	20	4	0.0666667	1	6.06	1.06	7.056	2.0607
1	60	20	4	0.0666667	1	7.53	1.28	8.526	2.27968
2	60	20	4	0.0666667	1	14.6	2.59	15.582	3.58798
4	60	20	4	0.0666667	1	25.6	5.18	26.607	6.17648
0	60	20	4	0.0666667	22.5	0.176	-0.000533	1.176	0.999467
0.001	60	20	4	0.0666667	22.5	0.029	0.0163	1.029	1.01631
0.01	60	20	4	0.0666667	22.5	0.176	0.0275	1.176	1.02754
0.1	60	20	4	0.0666667	22.5	0.764	0.174	1.764	1.17353
0.2	60	20	4	0.0666667	22.5	1.2	0.314	2.205	1.31391
0.4	60	20	4	0.0666667	22.5	3.12	0.527	4.116	1.52728
0.6	60	20	4	0.0666667	22.5	4.59	0.713	5.586	1.71257
0.8	60	20	4	0.0666667	22.5	5.61	1.03	6.615	2.02701
1	60	20	4	0.0666667	22.5	7.01	1.35	8.0115	2.34706
2	60	20	4	0.0666667	22.5	13	2.67	14.0385	3.6722
4	60	20	4	0.0666667	22.5	25.7	5.22	26.6805	6.2214
0	60	20	4	0.0666667	45	-0.118	0.129	0.882	1.12861
0.001	60	20	4	0.0666667	45	-0.192	-0.0174	0.8085	0.982622
0.01	60	20	4	0.0666667	45	-0.192	-0.0174	0.8085	0.982622
0.1	60	20	4	0.0666667	45	-0.0445	0.0332	0.9555	1.03316
0.2	60	20	4	0.0666667	45	0.543	0.134	1.5435	1.13423
0.4	60	20	4	0.0666667	45	1.79	0.348	2.793	1.3476
0.6	60	20	4	0.0666667	45	3.63	0.606	4.6305	1.60589
0.8	60	20	4	0.0666667	45	4.22	0.859	5.2185	1.85856
1	60	20	4	0.0666667	45	5.54	1.1	6.5415	2.1
2	60	20	4	0.0666667	45	10.9	1.93	11.907	2.92541
4	60	20	4	0.0666667	45	22.2	4.21	23.1525	5.21071
0	60	20	4	0.116667	1	-0.02	0.0444	0.98	1.04439
0.001	60	20	4	0.116667	1	-0.02	-0.00615	0.98	0.993852
0.01	60	20	4	0.116667	1	-0.02	-0.000533	0.98	0.999467
0.1	60	20	4	0.116667	1	0.111	0.213	1.11067	1.21284
0.2	60	20	4	0.116667	1	0.633	0.348	1.63333	1.3476
0.4	60	20	4	0.116667	1	2.07	0.662	3.07067	1.66204
0.6	60	20	4	0.116667	1	4.42	0.83	5.42266	1.83048
0.8	60	20	4	0.116667	1	5.93	1.14	6.92533	2.13931
1	60	20	4	0.116667	1	7.04	1.46	8.036	2.46498
2	60	20	4	0.116667	1	13.8	2.91	14.7653	3.90803
4	60	20	4	0.116667	1	24.5	5.73	25.5453	6.73237
0	60	20	4	0.116667	22.5	-0.0853	-0.0735	0.914666	0.926473
0.001	60	20	4	0.116667	22.5	-0.412	0.0612	0.588	1.06123
0.01	60	20	4	0.116667	22.5	-0.216	0.0725	0.784	1.07246
0.1	60	20	4	0.116667	22.5	0.307	0.123	1.30667	1.123
0.2	60	20	4	0.116667	22.5	1.35	0.241	2.352	1.24091
0.4	60	20	4	0.116667	22.5	2.53	0.471	3.528	1.47113
0.6	60	20	4	0.116667	22.5	3.83	0.684	4.83467	1.6845
0.8	60	20	4	0.116667	22.5	4.29	0.903	5.292	1.90348
1	60	20	4	0.116667	22.5	5.53	1.16	6.53333	2.16177
2	60	20	4	0.116667	22.5	12.2	2.58	13.1973	3.58236
4	60	20	4	0.116667	22.5	23.7	5.2	24.696	6.20456
0	60	20	4	0.116667	45	0.503	-0.0735	1.50267	0.926473
0.001	60	20	4	0.116667	45	-0.0853	0.05	0.914666	1.05
0.01	60	20	4	0.116667	45	-0.151	0.0668	0.849333	1.06685
0.1	60	20	4	0.116667	45	0.241	-0.00615	1.24133	0.993852
0.2	60	20	4	0.116667	45	0.699	0.0837	1.69867	1.08369
0.4	60	20	4	0.116667	45	1.81	0.258	2.80933	1.25776
0.6	60	20	4	0.116667	45	2.2	0.522	3.20133	1.52166
0.8	60	20	4	0.116667	45	3.64	0.718	4.63867	1.71819
1	60	20	4	0.116667	45	4.36	0.92	5.35733	1.92032
2	60	20	4	0.116667	45	10.1	2.27	11.1067	3.27354
4	60	20	4	0.116667	45	21.5	4.94	22.54	5.94065
0	60	20	5	0.0166667	1	-0.328	0.0725	0.672	1.07246
0.001	60	20	5	0.0166667	1	-0.328	0.0668	0.672	1.06685
0.01	60	20	5	0.0166667	1	-0.261	0.0837	0.7392	1.08369
0.1	60	20	5	0.0166667	1	0.142	-0.0735	1.1424	0.926473
0.2	60	20	5	0.0166667	1	0.814	0.101	1.8144	1.10054
0.4	60	20	5	0.0166667	1	2.36	0.308	3.36	1.30829
0.6	60	20	5	0.0166667	1	4.51	0.83	5.5104	1.83048
0.8	60	20	5	0.0166667	1	5.65	0.892	6.6528	1.89225
1	60	20	5	0.0166667	1	6.26	1.1	7.2576	2.1
2	60	20	5	0.0166667	1	14.2	2.84	15.1872	3.83503
4	60	20	5	0.0166667	1	26.8	5.79	27.7536	6.79413
0	60	20	5	0.0166667	22.5	-0.328	-0.0679	0.672	0.932087
0.001	60	20	5	0.0166667	22.5	-0.328	-0.0679	0.672	0.932087
0.01	60	20	5	0.0166667	22.5	-0.328	-0.0511	0.672	0.948932
0.1	60	20	5	0.0166667	22.5	0.613	-0.00615	1.6128	0.993852
0.2	60	20	5	0.0166667	22.5	0.882	0.162	1.8816	1.1623
0.4	60	20	5	0.0166667	22.5	2.29	0.353	3.2928	1.35321
0.6	60	20	5	0.0166667	22.5	3.77	0.724	4.7712	1.7238
0.8	60	20	5	0.0166667	22.5	5.45	1.09	6.4512	2.09439
1	60	20	5	0.0166667	22.5	6.86	1.39	7.8624	2.39198
2	60	20	5	0.0166667	22.5	12.4	2.54	13.3728	3.53744
4	60	20	5	0.0166667	22.5	25.5	5.45	26.4768	6.446
0	60	20	5	0.0166667	45	-0.126	-0.0455	0.8736	0.954547
0.001	60	20	5	0.0166667	45	-0.126	-0.0511	0.8736	0.948932
0.01	60	20	5	0.0166667	45	-0.126	-0.0455	0.8736	0.954547
0.1	60	20	5	0.0166667	45	0.613	0.258	1.6128	1.25776
0.2	60	20	5	0.0166667	45	1.42	0.325	2.4192	1.32514
0.4	60	20	5	0.0166667	45	2.96	0.516	3.9648	1.51605
0.6	60	20	5	0.0166667	45	3.23	0.797	4.2336	1.7968
0.8	60	20	5	0.0166667	45	4.11	0.757	5.1072	1.75749
1	60	20	5	0.0166667	45	4.91	0.965	5.9136	1.96524
2	60	20	5	0.0166667	45	12.2	2.33	13.1712	3.32969
4	60	20	5	0.0166667	45	23.8	4.61	24.7968	5.60937
0	60	20	5	0.0666667	1	-0.118	-0.0455	0.882	0.954547
0.001	60	20	5	0.0666667	1	-0.118	-0.0455	0.882	0.954547
0.01	60	20	5	0.0666667	1	-0.0592	-0.0398	0.9408	0.960162
0.1	60	20	5	0.0666667	1	0.176	0.0444	1.176	1.04439
0.2	60	20	5	0.0666667	1	0.705	0.213	1.7052	1.21284
0.4	60	20	5	0.0666667	1	1.53	0.454	2.5284	1.45428
0.6	60	20	5	0.0666667	1	4.23	1.02	5.2332	2.01578
0.8	60	20	5	0.0666667	1	5.06	1.06	6.0564	2.0607
1	60	20	5	0.0666667	1	6.17	1.28	7.1736	2.27968
2	60	20	5	0.0666667	1	12.3	2.59	13.3476	3.58798
4	60	20	5	0.0666667	1	21.9	5.18	22.932	6.17648
0	60	20	5	0.0666667	22.5	-0.0004	0.0107	0.9996	1.0107
0.001	60	20	5	0.0666667	22.5	-0.0004	0.0163	0.9996	1.01631
0.01	60	20	5	0.0666667	22.5	0.0584	0.0275	1.0584	1.02754
0.1	60	20	5	0.0666667	22.5	0.646	0.174	1.6464	1.17353
0.2	60	20	5	0.0666667	22.5	1.12	0.314	2.1168	1.31391
0.4	60	20	5	0.0666667	22.5	2.76	0.527	3.7632	1.52728
0.6	60	20	5	0.0666667	22.5	2.53	0.713	3.528	1.71257
0.8	60	20	5	0.0666667	22.5	4.64	1.03	5.6448	2.02701
1	60	20	5	0.0666667	22.5	5.59	1.35	6.5856	2.34706
2	60	20	5	0.0666667	22.5	10.9	2.67	11.9364	3.6722
4	60	20	5	0.0666667	22.5	21.5	5.22	22.4616	6.2214
0	60	20	5	0.0666667	45	-0.236	-0.0174	0.7644	0.982622
0.001	60	20	5	0.0666667	45	-0.177	-0.0174	0.8232	0.982622
0.01	60	20	5	0.0666667	45	-0.177	-0.0174	0.8232	0.982622
0.1	60	20	5	0.0666667	45	-0.0004	0.0332	0.9996	1.03316
0.2	60	20	5	0.0666667	45	0.411	0.134	1.4112	1.13423
0.4	60	20	5	0.0666667	45	1.35	0.348	2.352	1.3476
0.6	60	20	5	0.0666667	45	2.23	0.477	3.234	1.47674
0.8	60	20	5	0.0666667	45	3.35	0.859	4.3512	1.85856
1	60	20	5	0.0666667	45	4.59	1.1	5.586	2.1
2	60	20	5	0.0666667	45	8.94	1.93	9.9372	2.92541
4	60	20	5	0.0666667	45	18.6	4.21	19.5804	5.21071
0	60	20	5	0.116667	1	-0.0592	-0.0286	0.9408	0.971392
0.001	60	20	5	0.116667	1	-0.111	-0.00615	0.888533	0.993852
0.01	60	20	5	0.116667	1	-0.0592	-0.000533	0.9408	0.999467
0.1	60	20	5	0.116667	1	0.202	0.213	1.20213	1.21284
0.2	60	20	5	0.116667	1	0.463	0.348	1.46347	1.3476
0.4	60	20	5	0.116667	1	1.72	0.662	2.71787	1.66204
0.6	60	20	5	0.116667	1	3.86	0.932	4.8608	1.93155
0.8	60	20	5	0.116667	1	4.91	1.14	5.90613	2.13931
1	60	20	5	0.116667	1	5.9	1.46	6.8992	2.46498
2	60	20	5	0.116667	1	11.3	2.91	12.2827	3.90803
4	60	20	5	0.116667	1	20.4	5.73	21.4293	6.73237
0	60	20	5	0.116667	22.5	-0.164	0.0556	0.836266	1.05562
0.001	60	20	5	0.116667	22.5	-0.164	0.0612	0.836266	1.06123
0.01	60	20	5	0.116667	22.5	-0.111	0.0725	0.888533	1.07246
0.1	60	20	5	0.116667	22.5	0.307	0.123	1.30667	1.123
0.2	60	20	5	0.116667	22.5	1.09	0.241	2.09067	1.24091
0.4	60	20	5	0.116667	22.5	2.03	0.471	3.03147	1.47113
0.6	60	20	5	0.116667	22.5	2.24	0.825	3.24053	1.82487
0.8	60	20	5	0.116667	22.5	3.76	0.903	4.75627	1.90348
1	60	20	5	0.116667	22.5	4.59	1.16	5.59253	2.16177
2	60	20	5	0.116667	22.5	10	2.58	11.0283	3.58236
4	60	20	5	0.116667	22.5	19.6	5.2	20.6453	6.20456
0	60	20	5	0.116667	45	-0.111	0.0388	0.888533	1.03877
0.001	60	20	5	0.116667	45	-0.164	0.05	0.836266	1.05
0.01	60	20	5	0.116667	45	-0.164	0.0668	0.836266	1.06685
0.1	60	20	5	0.116667	45	0.202	-0.00615	1.20213	0.993852
0.2	60	20	5	0.116667	45	0.62	0.0837	1.62027	1.08369
0.4	60	20	5	0.116667	45	1.4	0.258	2.40427	1.25776
0.6	60	20	5	0.116667	45	2.45	0.617	3.4496	1.61712
0.8	60	20	5	0.116667	45	2.87	0.718	3.86773	1.71819
1	60	20	5	0.116667	45	3.44	0.92	4.44267	1.92032
2	60	20	5	0.116667	45	8.09	2.27	9.0944	3.27354
4	60	20	5	0.116667	45	18.1	4.94	19.0773	5.94065
0	60	20	8	0.0166667	1	-0.118	0.0725	0.882	1.07246
0.001	60	20	8	0.0166667	1	-0.118	0.0668	0.882	1.06685
0.01	60	20	8	0.0166667	1	-0.076	0.0837	0.924	1.08369
0.1	60	20	8	0.0166667	1	0.05	-0.0735	1.05	0.926473
0.2	60	20	8	0.0166667	1	0.47	0.101	1.47	1.10054
0.4	60	20	8	0.0166667	1	1.56	0.308	2.562	1.30829
0.6	60	20	8	0.0166667	1	3.33	0.64	4.326	1.63958
0.8	60	20	8	0.0166667	1	3.87	0.892	4.872	1.89225
1	60	20	8	0.0166667	1	4.5	1.1	5.502	2.1
2	60	20	8	0.0166667	1	9.92	2.84	10.92	3.83503
4	60	20	8	0.0166667	1	18.9	5.79	19.908	6.79413
0	60	20	8	0.0166667	22.5	-0.286	-0.0679	0.714	0.932087
0.001	60	20	8	0.0166667	22.5	-0.286	-0.0679	0.714	0.932087
0.01	60	20	8	0.0166667	22.5	-0.244	-0.0511	0.756	0.948932
0.1	60	20	8	0.0166667	22.5	0.428	-0.00615	1.428	0.993852
0.2	60	20	8	0.0166667	22.5	0.722	0.162	1.722	1.1623
0.4	60	20	8	0.0166667	22.5	1.73	0.353	2.73	1.35321
0.6	60	20	8	0.0166667	22.5	3.24	0.78	4.242	1.77995
0.8	60	20	8	0.0166667	22.5	3.87	1.09	4.872	2.09439
1	60	20	8	0.0166667	22.5	4.84	1.39	5.838	2.39198
2	60	20	8	0.0166667	22.5	8.79	2.54	9.786	3.53744
4	60	20	8	0.0166667	22.5	17.8	5.45	18.774	6.446
0	60	20	8	0.0166667	45	-0.16	-0.0455	0.84	0.954547
0.001	60	20	8	0.0166667	45	-0.16	-0.0511	0.84	0.948932
0.01	60	20	8	0.0166667	45	-0.16	-0.0455	0.84	0.954547
0.1	60	20	8	0.0166667	45	0.47	0.258	1.47	1.25776
0.2	60	20	8	0.0166667	45	0.932	0.325	1.932	1.32514
0.4	60	20	8	0.0166667	45	2.02	0.516	3.024	1.51605
0.6	60	20	8	0.0166667	45	2.11	0.567	3.108	1.56658
0.8	60	20	8	0.0166667	45	2.86	0.757	3.864	1.75749
1	60	20	8	0.0166667	45	3.37	0.965	4.368	1.96524
2	60	20	8	0.0166667	45	8.62	2.33	9.618	3.32969
4	60	20	8	0.0166667	45	16.4	4.61	17.43	5.60937
0	60	20	8	0.0666667	1	-0.0813	-0.0455	0.91875	0.954547
0.001	60	20	8	0.0666667	1	-0.0813	-0.0455	0.91875	0.954547
0.01	60	20	8	0.0666667	1	-0.0813	-0.0398	0.91875	0.960162
0.1	60	20	8	0.0666667	1	0.249	0.0444	1.2495	1.04439
0.2	60	20	8	0.0666667	1	0.47	0.213	1.47	1.21284
0.4	60	20	8	0.0666667	1	0.984	0.454	1.9845	1.45428
0.6	60	20	8	0.0666667	1	2.42	0.808	3.41775	1.80803
0.8	60	20	8	0.0666667	1	3.19	1.06	4.1895	2.0607
1	60	20	8	0.0666667	1	4.03	1.28	5.03475	2.27968
2	60	20	8	0.0666667	1	8.37	2.59	9.37125	3.58798
4	60	20	8	0.0666667	1	15.5	5.18	16.5007	6.17648
0	60	20	8	0.0666667	22.5	-0.192	0.0107	0.8085	1.0107
0.001	60	20	8	0.0666667	22.5	-0.192	0.0163	0.8085	1.01631
0.01	60	20	8	0.0666667	22.5	-0.118	0.0275	0.882	1.02754
0.1	60	20	8	0.0666667	22.5	0.176	0.174	1.176	1.17353
0.2	60	20	8	0.0666667	22.5	0.837	0.314	1.8375	1.31391
0.4	60	20	8	0.0666667	22.5	1.61	0.527	2.60925	1.52728
0.6	60	20	8	0.0666667	22.5	2.27	0.713	3.27075	1.71257
0.8	60	20	8	0.0666667	22.5	3.15	1.03	4.15275	2.02701
1	60	20	8	0.0666667	22.5	3.85	1.35	4.851	2.34706
2	60	20	8	0.0666667	22.5	7.34	2.67	8.34225	3.6722
4	60	20	8	0.0666667	22.5	15.1	5.22	16.1332	6.2214
0	60	20	8	0.0666667	45	-0.228	-0.0174	0.77175	0.982622
0.001	60	20	8	0.0666667	45	-0.155	-0.0174	0.84525	0.982622
0.01	60	20	8	0.0666667	45	-0.118	-0.0174	0.882	0.982622
0.1	60	20	8	0.0666667	45	-0.118	0.0332	0.882	1.03316
0.2	60	20	8	0.0666667	45	0.286	0.134	1.28625	1.13423
0.4	60	20	8	0.0666667	45	0.948	0.348	1.94775	1.3476
0.6	60	20	8	0.0666667	45	1.68	0.606	2.68275	1.60589
0.8	60	20	8	0.0666667	45	2.27	0.859	3.27075	1.85856
1	60	20	8	0.0666667	45	2.97	1.1	3.969	2.1
2	60	20	8	0.0666667	45	5.91	1.93	6.909	2.92541
4	60	20	8	0.0666667	45	13.4	4.21	14.406	5.21071
0	60	20	8	0.116667	1	-0.183	-0.0286	0.816666	0.971392
0.001	60	20	8	0.116667	1	-0.216	-0.00615	0.784	0.993852
0.01	60	20	8	0.116667	1	-0.0853	-0.000533	0.914666	0.999467
0.1	60	20	8	0.116667	1	0.078	0.213	1.078	1.21284
0.2	60	20	8	0.116667	1	0.307	0.348	1.30667	1.3476
0.4	60	20	8	0.116667	1	1.16	0.662	2.156	1.66204
0.6	60	20	8	0.116667	1	2.66	0.83	3.65867	1.83048
0.8	60	20	8	0.116667	1	3.57	1.14	4.57333	2.13931
1	60	20	8	0.116667	1	4.23	1.46	5.22666	2.46498
2	60	20	8	0.116667	1	7.69	2.91	8.68933	3.90803
4	60	20	8	0.116667	1	14.4	5.73	15.4187	6.73237
0	60	20	8	0.116667	22.5	-0.118	0.0556	0.882	1.05562
0.001	60	20	8	0.116667	22.5	-0.118	0.0612	0.882	1.06123
0.01	60	20	8	0.116667	22.5	-0.118	0.0725	0.882	1.07246
0.1	60	20	8	0.116667	22.5	0.274	0.123	1.274	1.123
0.2	60	20	8	0.116667	22.5	0.568	0.241	1.568	1.24091
0.4	60	20	8	0.116667	22.5	1.19	0.471	2.18867	1.47113
0.6	60	20	8	0.116667	22.5	2.1	0.684	3.10333	1.6845
0.8	60	20	8	0.116667	22.5	2.59	0.903	3.59333	1.90348
1	60	20	8	0.116667	22.5	3.48	1.16	4.47533	2.16177
2	60	20	8	0.116667	22.5	6.74	2.58	7.742	3.58236
4	60	20	8	0.116667	22.5	13.6	5.2	14.6347	6.20456
0	60	20	8	0.116667	45	0.111	0.0388	1.11067	1.03877
0.001	60	20	8	0.116667	45	0.078	0.05	1.078	1.05
0.01	60	20	8	0.116667	45	0.0127	0.0668	1.01267	1.06685
0.1	60	20	8	0.116667	45	0.143	-0.00615	1.14333	0.993852
0.2	60	20	8	0.116667	45	0.437	0.0837	1.43733	1.08369
0.4	60	20	8	0.116667	45	0.764	0.258	1.764	1.25776
0.6	60	20	8	0.116667	45	1.29	0.522	2.28667	1.52166
0.8	60	20	8	0.116667	45	1.78	0.718	2.77667	1.71819
1	60	20	8	0.116667	45	2.33	0.92	3.332	1.92032
2	60	20	8	0.116667	45	5.73	2.27	6.72933	3.27354
4	60	20	8	0.116667	45	12.8	4.94	13.7853	5.94065
0	60	20	10	0.0166667	1	0.0416	0.0725	1.0416	1.07246
0.001	60	20	10	0.0166667	1	0.0416	0.0668	1.0416	1.06685
0.01	60	20	10	0.0166667	1	0.0416	0.0837	1.0416	1.08369
0.1	60	20	10	0.0166667	1	0.142	-0.0735	1.1424	0.926473
0.2	60	20	10	0.0166667	1	0.478	0.101	1.4784	1.10054
0.4	60	20	10	0.0166667	1	1.32	0.308	2.3184	1.30829
0.6	60	20	10	0.0166667	1	2.66	0.64	3.6624	1.63958
0.8	60	20	10	0.0166667	1	3.2	0.892	4.2	1.89225
1	60	20	10	0.0166667	1	3.67	1.1	4.6704	2.1
2	60	20	10	0.0166667	1	8.58	2.84	9.576	3.83503
4	60	20	10	0.0166667	1	16.1	5.79	17.136	6.79413
0	60	20	10	0.0166667	22.5	-0.294	-0.0679	0.7056	0.932087
0.001	60	20	10	0.0166667	22.5	-0.294	-0.0679	0.7056	0.932087
0.01	60	20	10	0.0166667	22.5	-0.227	-0.0511	0.7728	0.948932
0.1	60	20	10	0.0166667	22.5	0.277	-0.00615	1.2768	0.993852
0.2	60	20	10	0.0166667	22.5	0.646	0.162	1.6464	1.1623
0.4	60	20	10	0.0166667	22.5	1.39	0.353	2.3856	1.35321
0.6	60	20	10	0.0166667	22.5	2.7	0.78	3.696	1.77995
0.8	60	20	10	0.0166667	22.5	3.54	1.09	4.536	2.09439
1	60	20	10	0.0166667	22.5	4.14	1.39	5.1408	2.39198
2	60	20	10	0.0166667	22.5	7.37	2.54	8.3664	3.53744
4	60	20	10	0.0166667	22.5	15.5	5.45	16.464	6.446
0	60	20	10	0.0166667	45	-0.126	-0.0455	0.8736	0.954547
0.001	60	20	10	0.0166667	45	-0.126	-0.0511	0.8736	0.948932
0.01	60	20	10	0.0166667	45	-0.126	-0.0455	0.8736	0.954547
0.1	60	20	10	0.0166667	45	0.411	0.258	1.4112	1.25776
0.2	60	20	10	0.0166667	45	0.848	0.325	1.848	1.32514
0.4	60	20	10	0.0166667	45	1.69	0.516	2.688	1.51605
0.6	60	20	10	0.0166667	45	1.89	0.567	2.8896	1.56658
0.8	60	20	10	0.0166667	45	2.49	0.757	3.4944	1.75749
1	60	20	10	0.0166667	45	3	0.965	3.9984	1.96524
2	60	20	10	0.0166667	45	7.33	2.33	8.3328	3.32969
4	60	20	10	0.0166667	45	14.2	4.61	15.1872	5.60937
0	60	20	10	0.0666667	1	-0.147	-0.0455	0.8526	0.954547
0.001	60	20	10	0.0666667	1	-0.147	-0.0455	0.8526	0.954547
0.01	60	20	10	0.0666667	1	-0.177	-0.0398	0.8232	0.960162
0.1	60	20	10	0.0666667	1	0.205	0.0444	1.2054	1.04439
0.2	60	20	10	0.0666667	1	0.47	0.213	1.47	1.21284
0.4	60	20	10	0.0666667	1	0.852	0.454	1.8522	1.45428
0.6	60	20	10	0.0666667	1	2	0.808	2.9988	1.80803
0.8	60	20	10	0.0666667	1	2.5	1.06	3.4986	2.0607
1	60	20	10	0.0666667	1	3.32	1.28	4.3218	2.27968
2	60	20	10	0.0666667	1	6.79	2.59	7.791	3.58798
4	60	20	10	0.0666667	1	13.3	5.18	14.3472	6.17648
0	60	20	10	0.0666667	22.5	-0.0298	0.0107	0.9702	1.0107
0.001	60	20	10	0.0666667	22.5	-0.0298	0.0163	0.9702	1.01631
0.01	60	20	10	0.0666667	22.5	-0.0004	0.0275	0.9996	1.02754
0.1	60	20	10	0.0666667	22.5	0.294	0.174	1.2936	1.17353
0.2	60	20	10	0.0666667	22.5	0.617	0.314	1.617	1.31391
0.4	60	20	10	0.0666667	22.5	1.32	0.527	2.3226	1.52728
0.6	60	20	10	0.0666667	22.5	2	0.713	2.9988	1.71257
0.8	60	20	10	0.0666667	22.5	2.82	1.03	3.822	2.02701
1	60	20	10	0.0666667	22.5	3.47	1.35	4.4688	2.34706
2	60	20	10	0.0666667	22.5	6.29	2.67	7.2912	3.6722
4	60	20	10	0.0666667	22.5	12.9	5.22	13.9356	6.2214
0	60	20	10	0.0666667	45	-0.147	-0.0174	0.8526	0.982622
0.001	60	20	10	0.0666667	45	-0.118	-0.0174	0.882	0.982622
0.01	60	20	10	0.0666667	45	-0.118	-0.0174	0.882	0.982622
0.1	60	20	10	0.0666667	45	0.0584	0.0332	1.0584	1.03316
0.2	60	20	10	0.0666667	45	0.323	0.134	1.323	1.13423
0.4	60	20	10	0.0666667	45	0.823	0.348	1.8228	1.3476
0.6	60	20	10	0.0666667	45	1.35	0.606	2.352	1.60589
0.8	60	20	10	0.0666667	45	1.85	0.859	2.8518	1.85856
1	60	20	10	0.0666667	45	2.41	1.1	3.4104	2.1
2	60	20	10	0.0666667	45	5.09	1.93	6.0858	2.92541
4	60	20	10	0.0666667	45	11.8	4.21	12.7596	5.21071
0	60	20	10	0.116667	1	-0.0592	-0.0286	0.9408	0.971392
0.001	60	20	10	0.116667	1	-0.0853	-0.00615	0.914666	0.993852
0.01	60	20	10	0.116667	1	-0.0592	-0.000533	0.9408	0.999467
0.1	60	20	10	0.116667	1	-0.0853	0.213	0.914666	1.21284
0.2	60	20	10	0.116667	1	0.0976	0.348	1.0976	1.3476
0.4	60	20	10	0.116667	1	0.882	0.662	1.8816	1.66204
0.6	60	20	10	0.116667	1	2.24	0.83	3.24053	1.83048
0.8	60	20	10	0.116667	1	2.92	1.14	3.92	2.13931
1	60	20	10	0.116667	1	3.44	1.46	4.44267	2.46498
2	60	20	10	0.116667	1	6.5	2.91	7.50026	3.90803
4	60	20	10	0.116667	1	12.2	5.73	13.1973	6.73237
0	60	20	10	0.116667	22.5	-0.164	0.0556	0.836266	1.05562
0.001	60	20	10	0.116667	22.5	-0.164	0.0612	0.836266	1.06123
0.01	60	20	10	0.116667	22.5	-0.19	0.0725	0.810133	1.07246
0.1	60	20	10	0.116667	22.5	0.254	0.123	1.2544	1.123
0.2	60	20	10	0.116667	22.5	0.385	0.241	1.38507	1.24091
0.4	60	20	10	0.116667	22.5	1.01	0.471	2.01227	1.47113
0.6	60	20	10	0.116667	22.5	1.82	0.684	2.8224	1.6845
0.8	60	20	10	0.116667	22.5	2.29	0.903	3.2928	1.90348
1	60	20	10	0.116667	22.5	2.82	1.16	3.81547	2.16177
2	60	20	10	0.116667	22.5	5.53	2.58	6.53333	3.58236
4	60	20	10	0.116667	22.5	11.7	5.2	12.7008	6.20456
0	60	20	10	0.116667	45	0.124	0.0388	1.12373	1.03877
0.001	60	20	10	0.116667	45	0.124	0.05	1.12373	1.05
0.01	60	20	10	0.116667	45	0.124	0.0668	1.12373	1.06685
0.1	60	20	10	0.116667	45	0.124	-0.00615	1.12373	0.993852
0.2	60	20	10	0.116667	45	0.254	0.0837	1.2544	1.08369
0.4	60	20	10	0.116667	45	0.725	0.258	1.7248	1.25776
0.6	60	20	10	0.116667	45	1.25	0.522	2.24747	1.52166
0.8	60	20	10	0.116667	45	1.56	0.718	2.56107	1.71819
1	60	20	10	0.116667	45	2.01	0.92	3.00533	1.92032
2	60	20	10	0.116667	45	4.93	2.27	5.93226	3.27354
4	60	20	10	0.116667	45	11.2	4.94	12.2304	5.94065
0	60	20	20	0.0166667	1	0.008	0.0725	1.008	1.07246
0.001	60	20	20	0.0166667	1	0.008	0.0668	1.008	1.06685
0.01	60	20	20	0.0166667	1	0.0416	0.0837	1.0416	1.08369
0.1	60	20	20	0.0166667	1	-0.0592	-0.0735	0.9408	0.926473
0.2	60	20	20	0.0166667	1	0.193	0.101	1.1928	1.10054
0.6	60	20	20	0.0166667	1	1.44	0.64	2.436	1.63958
0.8	60	20	20	0.0166667	1	1.82	0.892	2.8224	1.89225
1	60	20	20	0.0166667	1	2.26	1.1	3.2592	2.1
2	60	20	20	0.0166667	1	5.37	2.84	6.3672	3.83503
4	60	20	20	0.0166667	1	10.5	5.79	11.4912	6.79413
0	60	20	20	0.0166667	22.5	-0.294	-0.0679	0.7056	0.932087
0.001	60	20	20	0.0166667	22.5	-0.311	-0.0679	0.6888	0.932087
0.01	60	20	20	0.0166667	22.5	-0.311	-0.0511	0.6888	0.948932
0.1	60	20	20	0.0166667	22.5	-0.0088	-0.00615	0.9912	0.993852
0.2	60	20	20	0.0166667	22.5	0.277	0.162	1.2768	1.1623
0.6	60	20	20	0.0166667	22.5	1.6	0.78	2.604	1.77995
0.8	60	20	20	0.0166667	22.5	2.09	1.09	3.0912	2.09439
1	60	20	20	0.0166667	22.5	2.66	1.39	3.6624	2.39198
2	60	20	20	0.0166667	22.5	5.13	2.54	6.132	3.53744
4	60	20	20	0.0166667	22.5	10.2	5.45	11.2392	6.446
0	60	20	20	0.0166667	45	-0.143	-0.0455	0.8568	0.954547
0.001	60	20	20	0.0166667	45	-0.177	-0.0511	0.8232	0.948932
0.01	60	20	20	0.0166667	45	-0.126	-0.0455	0.8736	0.954547
0.1	60	20	20	0.0166667	45	0.226	0.258	1.2264	1.25776
0.2	60	20	20	0.0166667	45	0.378	0.325	1.3776	1.32514
0.6	60	20	20	0.0166667	45	1.02	0.567	2.016	1.56658
0.8	60	20	20	0.0166667	45	1.45	0.757	2.4528	1.75749
1	60	20	20	0.0166667	45	1.74	0.965	2.7384	1.96524
2	60	20	20	0.0166667	45	4.54	2.33	5.544	3.32969
4	60	20	20	0.0166667	45	8.95	4.61	9.9456	5.60937
0	60	20	20	0.0666667	1	-0.162	-0.0455	0.8379	0.954547
0.001	60	20	20	0.0666667	1	-0.133	-0.0455	0.8673	0.954547
0.01	60	20	20	0.0666667	1	-0.118	-0.0398	0.882	0.960162
0.1	60	20	20	0.0666667	1	-0.0004	0.0444	0.9996	1.04439
0.2	60	20	20	0.0666667	1	0.205	0.213	1.2054	1.21284
0.6	60	20	20	0.0666667	1	1.26	0.808	2.2638	1.80803
0.8	60	20	20	0.0666667	1	1.6	1.06	2.6019	2.0607
1	60	20	20	0.0666667	1	2.15	1.28	3.1458	2.27968
2	60	20	20	0.0666667	1	4.34	2.59	5.3361	3.58798
4	60	20	20	0.0666667	1	8.58	5.18	9.5844	6.17648
0	60	20	20	0.0666667	22.5	-0.0004	0.0107	0.9996	1.0107
0.001	60	20	20	0.0666667	22.5	0.0143	0.0163	1.0143	1.01631
0.01	60	20	20	0.0666667	22.5	0.0437	0.0275	1.0437	1.02754
0.1	60	20	20	0.0666667	22.5	0.0584	0.174	1.0584	1.17353
0.2	60	20	20	0.0666667	22.5	0.294	0.314	1.2936	1.31391
0.6	60	20	20	0.0666667	22.5	1.22	0.713	2.2197	1.71257
0.8	60	20	20	0.0666667	22.5	1.68	1.03	2.6754	2.02701
1	60	20	20	0.0666667	22.5	2.12	1.35	3.1164	2.34706
2	60	20	20	0.0666667	22.5	4.07	2.67	5.0715	3.6722
4	60	20	20	0.0666667	22.5	8.47	5.22	9.4668	6.2214
0	60	20	20	0.0666667	45	-0.265	-0.0174	0.735	0.982622
0.001	60	20	20	0.0666667	45	-0.265	-0.0174	0.735	0.982622
0.01	60	20	20	0.0666667	45	-0.28	-0.0174	0.7203	0.982622
0.1	60	20	20	0.0666667	45	-0.103	0.0332	0.8967	1.03316
0.2	60	20	20	0.0666667	45	0.029	0.134	1.029	1.13423
0.6	60	20	20	0.0666667	45	0.852	0.606	1.8522	1.60589
0.8	60	20	20	0.0666667	45	1.22	0.859	2.2197	1.85856
1	60	20	20	0.0666667	45	1.4	1.1	2.3961	2.1
2	60	20	20	0.0666667	45	3.19	1.93	4.1895	2.92541
4	60	20	20	0.0666667	45	7.14	4.21	8.1438	5.21071
0	60	20	20	0.116667	1	-0.0461	-0.0286	0.953866	0.971392
0.001	60	20	20	0.116667	1	-0.02	-0.00615	0.98	0.993852
0.01	60	20	20	0.116667	1	-0.02	-0.000533	0.98	0.999467
0.1	60	20	20	0.116667	1	-0.0461	0.213	0.953866	1.21284
0.2	60	20	20	0.116667	1	0.0323	0.348	1.03227	1.3476
0.6	60	20	20	0.116667	1	1.22	0.83	2.22133	1.83048
0.8	60	20	20	0.116667	1	1.81	1.14	2.80933	2.13931
1	60	20	20	0.116667	1	2.06	1.46	3.0576	2.46498
2	60	20	20	0.116667	1	3.95	2.91	4.95227	3.90803
4	60	20	20	0.116667	1	7.82	5.73	8.82	6.73237
0	60	20	20	0.116667	22.5	-0.00693	0.0556	0.993066	1.05562
0.001	60	20	20	0.116667	22.5	-0.00693	0.0612	0.993066	1.06123
0.01	60	20	20	0.116667	22.5	-0.00693	0.0725	0.993066	1.07246
0.1	60	20	20	0.116667	22.5	0.0715	0.123	1.07147	1.123
0.2	60	20	20	0.116667	22.5	0.176	0.241	1.176	1.24091
0.6	60	20	20	0.116667	22.5	1.13	0.684	2.12987	1.6845
0.8	60	20	20	0.116667	22.5	1.37	0.903	2.36507	1.90348
1	60	20	20	0.116667	22.5	1.68	1.16	2.67867	2.16177
2	60	20	20	0.116667	22.5	3.68	2.58	4.67787	3.58236
4	60	20	20	0.116667	22.5	7.57	5.2	8.57173	6.20456
0	60	20	20	0.116667	45	0.176	0.0388	1.176	1.03877
0.001	60	20	20	0.116667	45	0.15	0.05	1.14987	1.05
0.01	60	20	20	0.116667	45	0.124	0.0668	1.12373	1.06685
0.1	60	20	20	0.116667	45	-0.00693	-0.00615	0.993066	0.993852
0.2	60	20	20	0.116667	45	0.0453	0.0837	1.04533	1.08369
0.6	60	20	20	0.116667	45	0.45	0.522	1.4504	1.52166
0.8	60	20	20	0.116667	45	0.79	0.718	1.79013	1.71819
1	60	20	20	0.116667	45	1.14	0.92	2.14293	1.92032
2	60	20	20	0.116667	45	3.13	2.27	4.12907	3.27354
4	60	20	20	0.116667	45	7.21	4.94	8.20586	5.94065
0	60	30	1	0.0166667	1	0.138	-0.0841	1.13806	0.915866
0.001	60	30	1	0.0166667	1	0.138	-0.0841	1.13806	0.915866
0.01	60	30	1	0.0166667	1	0.593	-0.0766	1.59329	0.923353
0.1	60	30	1	0.0166667	1	3.55	0.18	4.55226	1.18039
0.2	60	30	1	0.0166667	1	6.97	0.258	7.96645	1.25776
0.4	60	30	1	0.0166667	1	12.9	0.437	13.8844	1.43744
0.4	60	30	1	0.0166667	1	12.9	0.437	13.8844	1.43744
0.6	60	30	1	0.0166667	1	17.7	0.532	18.6643	1.53227
0.8	60	30	1	0.0166667	1	24.3	0.684	25.265	1.6845
1	60	30	1	0.0166667	1	30.2	0.907	31.183	1.9066
2	60	30	1	0.0166667	1	44.3	1.75	45.295	2.75259
4	60	30	1	0.0166667	1	50.2	3.48	51.2129	4.4845
0	60	30	1	0.0166667	22.5	-0.545	-0.0342	0.455226	0.965777
0.001	60	30	1	0.0166667	22.5	-0.545	-0.0342	0.455226	0.965777
0.01	60	30	1	0.0166667	22.5	-0.0895	-0.0267	0.910451	0.973264
0.1	60	30	1	0.0166667	22.5	3.78	0.0881	4.77987	1.08806
0.2	60	30	1	0.0166667	22.5	4.01	0.195	5.00748	1.19537
0.4	60	30	1	0.0166667	22.5	11.1	0.36	12.0635	1.36007
0.4	60	30	1	0.0166667	22.5	11.1	0.36	12.0635	1.36007
0.6	60	30	1	0.0166667	22.5	14.9	0.45	15.9329	1.44991
0.8	60	30	1	0.0166667	22.5	20.9	0.63	21.8508	1.62959
1	60	30	1	0.0166667	22.5	28.1	0.874	29.1344	1.87416
2	60	30	1	0.0166667	22.5	43.6	1.69	44.6121	2.6927
4	60	30	1	0.0166667	22.5	51.8	3.52	52.8062	4.51694
0	60	30	1	0.0166667	45	0.366	-0.0168	1.36568	0.983246
0.001	60	30	1	0.0166667	45	0.366	-0.0267	1.36568	0.973264
0.01	60	30	1	0.0166667	45	0.593	-0.0267	1.59329	0.973264
0.1	60	30	1	0.0166667	45	1.05	0.0506	2.04852	1.05063
0.2	60	30	1	0.0166667	45	4.01	0.0955	5.00748	1.09555
0.4	60	30	1	0.0166667	45	8.1	0.215	9.10451	1.21533
0.4	60	30	1	0.0166667	45	8.1	0.215	9.10451	1.21533
0.6	60	30	1	0.0166667	45	13.1	0.412	14.112	1.41248
0.8	60	30	1	0.0166667	45	17.2	0.53	18.209	1.52977
1	60	30	1	0.0166667	45	22.4	0.677	23.4441	1.67701
2	60	30	1	0.0166667	45	39.3	1.48	40.2875	2.47558
4	60	30	1	0.0166667	45	49.1	3.21	50.0748	4.205
0	60	30	1	0.0666667	1	-0.377	-0.0292	0.622588	0.970769
0.001	60	30	1	0.0666667	1	-0.377	-0.0292	0.622588	0.970769
0.01	60	30	1	0.0666667	1	-0.17	-0.0192	0.830117	0.980751
0.1	60	30	1	0.0666667	1	2.32	0.0756	3.32047	1.07558
0.2	60	30	1	0.0666667	1	5.85	0.168	6.84847	1.16792
0.4	60	30	1	0.0666667	1	10.6	0.323	11.6216	1.32264
0.4	60	30	1	0.0666667	1	10.6	0.323	11.6216	1.32264
0.6	60	30	1	0.0666667	1	16.8	0.562	17.8475	1.56221
0.8	60	30	1	0.0666667	1	20.2	0.747	21.168	1.74688
1	60	30	1	0.0666667	1	27.6	0.829	28.639	1.82924
2	60	30	1	0.0666667	1	37	1.67	37.9779	2.66774
4	60	30	1	0.0666667	1	44.9	3.37	45.864	4.36971
0	60	30	1	0.0666667	22.5	-0.17	-0.102	0.830117	0.898397
0.001	60	30	1	0.0666667	22.5	0.0376	-0.122	1.03765	0.878433
0.01	60	30	1	0.0666667	22.5	0.453	-0.114	1.45271	0.88592
0.1	60	30	1	0.0666667	22.5	1.49	0.0481	2.49035	1.04813
0.2	60	30	1	0.0666667	22.5	5.23	0.0681	6.22588	1.06809
0.4	60	30	1	0.0666667	22.5	10.8	0.225	11.8292	1.22531
0.4	60	30	1	0.0666667	22.5	10.8	0.225	11.8292	1.22531
0.6	60	30	1	0.0666667	22.5	12.9	0.465	13.9045	1.46489
0.8	60	30	1	0.0666667	22.5	17.3	0.615	18.2626	1.61462
1	60	30	1	0.0666667	22.5	24.7	0.879	25.7336	1.87915
2	60	30	1	0.0666667	22.5	40.1	1.65	41.0908	2.64778
4	60	30	1	0.0666667	22.5	47.4	3.46	48.3543	4.46204
0	60	30	1	0.0666667	45	0.245	-0.0542	1.24518	0.945813
0.001	60	30	1	0.0666667	45	0.0376	-0.0692	1.03765	0.93084
0.01	60	30	1	0.0666667	45	0.453	-0.0667	1.45271	0.933335
0.1	60	30	1	0.0666667	45	1.08	0.0307	2.07529	1.03066
0.2	60	30	1	0.0666667	45	6.26	0.133	7.26353	1.13298
0.4	60	30	1	0.0666667	45	9.17	0.245	10.1689	1.24528
0.4	60	30	1	0.0666667	45	9.17	0.245	10.1689	1.24528
0.6	60	30	1	0.0666667	45	11.5	0.417	12.4518	1.41747
0.8	60	30	1	0.0666667	45	15.8	0.562	16.8099	1.56221
1	60	30	1	0.0666667	45	23.9	0.787	24.9035	1.78681
2	60	30	1	0.0666667	45	34.3	1.43	35.28	2.43066
4	60	30	1	0.0666667	45	42.6	2.77	43.5812	3.76578
0	60	30	1	0.116667	1	-0.428	-0.112	0.572108	0.888415
0.001	60	30	1	0.116667	1	-0.428	-0.122	0.572108	0.878433
0.01	60	30	1	0.116667	1	-0.428	-0.117	0.572108	0.883424
0.1	60	30	1	0.116667	1	1.86	0.0806	2.86054	1.08057
0.2	60	30	1	0.116667	1	3.58	0.18	4.57686	1.18039
0.4	60	30	1	0.116667	1	7.01	0.378	8.00951	1.37754
0.4	60	30	1	0.116667	1	7.01	0.378	8.00951	1.37754
0.6	60	30	1	0.116667	1	14.6	0.522	15.6376	1.52228
0.8	60	30	1	0.116667	1	20.2	0.744	21.168	1.74439
1	60	30	1	0.116667	1	23.2	0.912	24.2192	1.91159
2	60	30	1	0.116667	1	35.4	1.75	36.4242	2.7476
4	60	30	1	0.116667	1	40	3.53	41.0011	4.53192
0	60	30	1	0.116667	22.5	0.144	-0.0168	1.14422	0.983246
0.001	60	30	1	0.116667	22.5	0.144	-0.0192	1.14422	0.980751
0.01	60	30	1	0.116667	22.5	0.526	-0.00677	1.52562	0.993228
0.1	60	30	1	0.116667	22.5	1.48	0.000715	2.47913	1.00072
0.2	60	30	1	0.116667	22.5	6.25	0.138	7.2467	1.13797
0.4	60	30	1	0.116667	22.5	10.8	0.33	11.8236	1.33013
0.4	60	30	1	0.116667	22.5	10.8	0.33	11.8236	1.33013
0.6	60	30	1	0.116667	22.5	12.2	0.422	13.1585	1.42246
0.8	60	30	1	0.116667	22.5	15.2	0.572	16.2097	1.5722
1	60	30	1	0.116667	22.5	18.5	0.862	19.4517	1.86168
2	60	30	1	0.116667	22.5	35.4	1.67	36.4242	2.67024
4	60	30	1	0.116667	22.5	42.7	3.42	43.6709	4.41962
0	60	30	1	0.116667	45	0.144	-0.0766	1.14422	0.923353
0.001	60	30	1	0.116667	45	0.144	-0.0791	1.14422	0.920857
0.01	60	30	1	0.116667	45	0.144	-0.0692	1.14422	0.93084
0.1	60	30	1	0.116667	45	1.86	0.0332	2.86054	1.03316
0.2	60	30	1	0.116667	45	4.91	0.138	5.91178	1.13797
0.4	60	30	1	0.116667	45	7.01	0.26	8.00951	1.26025
0.4	60	30	1	0.116667	45	7.01	0.26	8.00951	1.26025
0.6	60	30	1	0.116667	45	12.7	0.335	13.7306	1.33512
0.8	60	30	1	0.116667	45	17.7	0.457	18.6889	1.4574
1	60	30	1	0.116667	45	19.6	0.689	20.5959	1.68949
2	60	30	1	0.116667	45	32.4	1.4	33.373	2.39822
4	60	30	1	0.116667	45	41.7	2.88	42.7174	3.87559
0	60	30	2	0.0166667	1	0.252	0.0706	1.25187	1.07059
0.001	60	30	2	0.0166667	1	0.0243	-0.0841	1.02426	0.915866
0.01	60	30	2	0.0166667	1	0.138	-0.0766	1.13806	0.923353
0.1	60	30	2	0.0166667	1	1.5	0.17	2.50374	1.17041
0.2	60	30	2	0.0166667	1	3.55	0.258	4.55226	1.25776
0.4	60	30	2	0.0166667	1	6.63	0.437	7.62503	1.43744
0.6	60	30	2	0.0166667	1	8.67	0.532	9.67355	1.53227
0.8	60	30	2	0.0166667	1	12.3	0.684	13.3154	1.6845
1	60	30	2	0.0166667	1	15.5	0.907	16.5019	1.9066
2	60	30	2	0.0166667	1	28.9	1.75	29.9311	2.75259
4	60	30	2	0.0166667	1	43	3.48	44.0431	4.4845
0	60	30	2	0.0166667	22.5	-0.0895	-0.00428	0.910451	0.995724
0.001	60	30	2	0.0166667	22.5	-0.317	-0.0342	0.682839	0.965777
0.01	60	30	2	0.0166667	22.5	-0.317	-0.0267	0.682839	0.973264
0.1	60	30	2	0.0166667	22.5	1.28	0.0931	2.27613	1.09305
0.2	60	30	2	0.0166667	22.5	2.53	0.195	3.528	1.19537
0.4	60	30	2	0.0166667	22.5	5.94	0.36	6.94219	1.36007
0.6	60	30	2	0.0166667	22.5	7.65	0.45	8.64929	1.44991
0.8	60	30	2	0.0166667	22.5	11.2	0.63	12.1773	1.62959
1	60	30	2	0.0166667	22.5	14.7	0.874	15.7053	1.87416
2	60	30	2	0.0166667	22.5	30	1.69	30.9553	2.6927
4	60	30	2	0.0166667	22.5	44.3	3.52	45.295	4.51694
0	60	30	2	0.0166667	45	-0.0895	-0.0168	0.910451	0.983246
0.001	60	30	2	0.0166667	45	0.366	-0.0267	1.36568	0.973264
0.01	60	30	2	0.0166667	45	0.366	-0.0267	1.36568	0.973264
0.1	60	30	2	0.0166667	45	0.707	0.0182	1.7071	1.01818
0.2	60	30	2	0.0166667	45	1.85	0.0955	2.84516	1.09555
0.4	60	30	2	0.0166667	45	4.12	0.215	5.12129	1.21533
0.6	60	30	2	0.0166667	45	6.85	0.412	7.85264	1.41248
0.8	60	30	2	0.0166667	45	8.9	0.53	9.90116	1.52977
1	60	30	2	0.0166667	45	11.5	0.677	12.5187	1.67701
2	60	30	2	0.0166667	45	26.2	1.48	27.1997	2.47558
4	60	30	2	0.0166667	45	40.3	3.21	41.3117	4.205
0	60	30	2	0.0666667	1	0.349	-0.00178	1.34894	0.99822
0.001	60	30	2	0.0666667	1	-0.274	-0.0292	0.726353	0.970769
0.01	60	30	2	0.0666667	1	-0.17	-0.0192	0.830117	0.980751
0.1	60	30	2	0.0666667	1	1.91	0.101	2.90541	1.10054
0.2	60	30	2	0.0666667	1	3.46	0.168	4.46188	1.16792
0.4	60	30	2	0.0666667	1	5.85	0.323	6.84847	1.32264
0.6	60	30	2	0.0666667	1	8.44	0.562	9.44259	1.56221
0.8	60	30	2	0.0666667	1	10.5	0.747	11.5179	1.74688
1	60	30	2	0.0666667	1	14.1	0.829	15.1496	1.82924
2	60	30	2	0.0666667	1	25.1	1.67	26.1487	2.66774
4	60	30	2	0.0666667	1	39.9	3.37	40.8833	4.36971
0	60	30	2	0.0666667	22.5	-0.377	-0.0342	0.622588	0.965777
0.001	60	30	2	0.0666667	22.5	0.141	-0.122	1.14141	0.878433
0.01	60	30	2	0.0666667	22.5	0.245	-0.114	1.24518	0.88592
0.1	60	30	2	0.0666667	22.5	1.08	-0.0242	2.07529	0.97576
0.2	60	30	2	0.0666667	22.5	2.32	0.0681	3.32047	1.06809
0.4	60	30	2	0.0666667	22.5	5.54	0.225	6.53717	1.22531
0.6	60	30	2	0.0666667	22.5	6.47	0.465	7.47106	1.46489
0.8	60	30	2	0.0666667	22.5	8.86	0.615	9.85764	1.61462
1	60	30	2	0.0666667	22.5	12.9	0.879	13.9045	1.87915
2	60	30	2	0.0666667	22.5	26.1	1.65	27.0826	2.64778
4	60	30	2	0.0666667	22.5	40.1	3.46	41.0908	4.46204
0	60	30	2	0.0666667	45	-0.481	-0.0492	0.518823	0.950804
0.001	60	30	2	0.0666667	45	0.0376	-0.0692	1.03765	0.93084
0.01	60	30	2	0.0666667	45	0.0376	-0.0667	1.03765	0.933335
0.1	60	30	2	0.0666667	45	1.28	0.0681	2.28282	1.06809
0.2	60	30	2	0.0666667	45	3.05	0.133	4.04682	1.13298
0.4	60	30	2	0.0666667	45	4.71	0.245	5.70706	1.24528
0.6	60	30	2	0.0666667	45	6.37	0.417	7.36729	1.41747
0.8	60	30	2	0.0666667	45	8.03	0.562	9.02753	1.56221
1	60	30	2	0.0666667	45	11.9	0.787	12.8668	1.78681
2	60	30	2	0.0666667	45	21.7	1.43	22.7245	2.43066
4	60	30	2	0.0666667	45	33.4	2.77	34.4499	3.76578
0	60	30	2	0.116667	1	-0.619	-0.00677	0.381405	0.993228
0.001	60	30	2	0.116667	1	-0.428	-0.122	0.572108	0.878433
0.01	60	30	2	0.116667	1	-0.428	-0.117	0.572108	0.883424
0.1	60	30	2	0.116667	1	1	0.111	2.00238	1.11052
0.2	60	30	2	0.116667	1	1.86	0.18	2.86054	1.18039
0.4	60	30	2	0.116667	1	3.96	0.378	4.95827	1.37754
0.6	60	30	2	0.116667	1	7.68	0.522	8.67697	1.52228
0.8	60	30	2	0.116667	1	10.7	0.744	11.7282	1.74439
1	60	30	2	0.116667	1	12.5	0.912	13.5399	1.91159
2	60	30	2	0.116667	1	23.5	1.75	24.5053	2.7476
4	60	30	2	0.116667	1	37.2	3.53	38.2359	4.53192
0	60	30	2	0.116667	22.5	-0.333	-0.0517	0.667459	0.948308
0.001	60	30	2	0.116667	22.5	0.0489	-0.0192	1.04886	0.980751
0.01	60	30	2	0.116667	22.5	0.0489	-0.00677	1.04886	0.993228
0.1	60	30	2	0.116667	22.5	0.907	0.0556	1.90703	1.05562
0.2	60	30	2	0.116667	22.5	2.91	0.138	3.9094	1.13797
0.4	60	30	2	0.116667	22.5	5.2	0.33	6.19784	1.33013
0.6	60	30	2	0.116667	22.5	6.06	0.422	7.056	1.42246
0.8	60	30	2	0.116667	22.5	7.77	0.572	8.77232	1.5722
1	60	30	2	0.116667	22.5	9.3	0.862	10.2979	1.86168
2	60	30	2	0.116667	22.5	22.9	1.67	23.9332	2.67024
4	60	30	2	0.116667	22.5	37.7	3.42	38.7126	4.41962
0	60	30	2	0.116667	45	-0.428	-0.0617	0.572108	0.938326
0.001	60	30	2	0.116667	45	-0.142	-0.0791	0.858162	0.920857
0.01	60	30	2	0.116667	45	-0.0465	-0.0692	0.953513	0.93084
0.1	60	30	2	0.116667	45	1.77	0.0406	2.76519	1.04064
0.2	60	30	2	0.116667	45	2.34	0.138	3.3373	1.13797
0.4	60	30	2	0.116667	45	3.48	0.26	4.48151	1.26025
0.6	60	30	2	0.116667	45	6.53	0.335	7.53275	1.33512
0.8	60	30	2	0.116667	45	8.54	0.457	9.53513	1.4574
1	60	30	2	0.116667	45	9.77	0.689	10.7747	1.68949
2	60	30	2	0.116667	45	21.1	1.4	22.1215	2.39822
4	60	30	2	0.116667	45	33.8	2.88	34.8032	3.87559
0	60	30	4	0.0166667	1	0.0243	0.0706	1.02426	1.07059
0.001	60	30	4	0.0166667	1	-0.146	-0.0841	0.853548	0.915866
0.01	60	30	4	0.0166667	1	-0.0895	-0.0766	0.910451	0.923353
0.1	60	30	4	0.0166667	1	0.764	0.17	1.764	1.17041
0.2	60	30	4	0.0166667	1	1.79	0.258	2.78826	1.25776
0.4	60	30	4	0.0166667	1	3.78	0.437	4.77987	1.43744
0.6	60	30	4	0.0166667	1	4.29	0.532	5.292	1.53227
0.8	60	30	4	0.0166667	1	6.17	0.684	7.1698	1.6845
1	60	30	4	0.0166667	1	8.1	0.809	9.10451	1.80927
2	60	30	4	0.0166667	1	16	1.75	16.9572	2.75259
4	60	30	4	0.0166667	1	29.3	3.48	30.3294	4.4845
0	60	30	4	0.0166667	22.5	0.309	-0.00428	1.30877	0.995724
0.001	60	30	4	0.0166667	22.5	-0.317	-0.0342	0.682839	0.965777
0.01	60	30	4	0.0166667	22.5	-0.317	-0.0267	0.682839	0.973264
0.1	60	30	4	0.0166667	22.5	0.992	0.0931	1.99161	1.09305
0.2	60	30	4	0.0166667	22.5	1.67	0.195	2.67445	1.19537
0.4	60	30	4	0.0166667	22.5	3.72	0.36	4.72297	1.36007
0.6	60	30	4	0.0166667	22.5	4.52	0.45	5.51961	1.44991
0.8	60	30	4	0.0166667	22.5	5.89	0.63	6.88529	1.62959
1	60	30	4	0.0166667	22.5	7.54	0.779	8.53548	1.77933
2	60	30	4	0.0166667	22.5	15.6	1.69	16.6157	2.6927
4	60	30	4	0.0166667	22.5	30.1	3.52	31.0692	4.51694
0	60	30	4	0.0166667	45	-0.26	-0.0168	0.739742	0.983246
0.001	60	30	4	0.0166667	45	0.195	-0.0267	1.19497	0.973264
0.01	60	30	4	0.0166667	45	0.195	-0.0267	1.19497	0.973264
0.1	60	30	4	0.0166667	45	0.195	0.0182	1.19497	1.01818
0.2	60	30	4	0.0166667	45	0.764	0.0955	1.764	1.09555
0.4	60	30	4	0.0166667	45	2.07	0.215	3.07277	1.21533
0.6	60	30	4	0.0166667	45	3.21	0.412	4.21084	1.41248
0.8	60	30	4	0.0166667	45	4.75	0.53	5.74722	1.52977
1	60	30	4	0.0166667	45	6.17	0.652	7.1698	1.65205
2	60	30	4	0.0166667	45	14.5	1.48	15.4777	2.47558
4	60	30	4	0.0166667	45	28.6	3.21	29.5897	4.205
0	60	30	4	0.0666667	1	0.297	-0.00178	1.29706	0.99822
0.001	60	30	4	0.0666667	1	-0.17	-0.0292	0.830117	0.970769
0.01	60	30	4	0.0666667	1	-0.0661	-0.0192	0.933882	0.980751
0.1	60	30	4	0.0666667	1	0.868	0.101	1.86776	1.10054
0.2	60	30	4	0.0666667	1	1.59	0.168	2.59412	1.16792
0.4	60	30	4	0.0666667	1	2.84	0.323	3.83929	1.32264
0.6	60	30	4	0.0666667	1	4.4	0.562	5.39576	1.56221
0.8	60	30	4	0.0666667	1	5.69	0.747	6.69282	1.74688
1	60	30	4	0.0666667	1	7.3	0.954	8.30117	1.95401
2	60	30	4	0.0666667	1	13.4	1.67	14.4233	2.66774
4	60	30	4	0.0666667	1	27.5	3.37	28.4834	4.36971
0	60	30	4	0.0666667	22.5	-0.0661	-0.0342	0.933882	0.965777
0.001	60	30	4	0.0666667	22.5	0.0376	-0.122	1.03765	0.878433
0.01	60	30	4	0.0666667	22.5	0.0895	-0.114	1.08953	0.88592
0.1	60	30	4	0.0666667	22.5	0.245	-0.0242	1.24518	0.97576
0.2	60	30	4	0.0666667	22.5	1.02	0.0681	2.02341	1.06809
0.4	60	30	4	0.0666667	22.5	2.74	0.225	3.73553	1.22531
0.6	60	30	4	0.0666667	22.5	3.36	0.465	4.35812	1.46489
0.8	60	30	4	0.0666667	22.5	4.97	0.615	5.96647	1.61462
1	60	30	4	0.0666667	22.5	6.42	0.822	7.41917	1.82175
2	60	30	4	0.0666667	22.5	13.7	1.65	14.6827	2.64778
4	60	30	4	0.0666667	22.5	27.8	3.46	28.8466	4.46204
0	60	30	4	0.0666667	45	-0.222	-0.0492	0.778235	0.950804
0.001	60	30	4	0.0666667	45	-0.222	-0.0692	0.778235	0.93084
0.01	60	30	4	0.0666667	45	-0.17	-0.0667	0.830117	0.933335
0.1	60	30	4	0.0666667	45	1.13	0.0681	2.12718	1.06809
0.2	60	30	4	0.0666667	45	1.91	0.133	2.90541	1.13298
0.4	60	30	4	0.0666667	45	2.68	0.245	3.68365	1.24528
0.6	60	30	4	0.0666667	45	2.99	0.417	3.99494	1.41747
0.8	60	30	4	0.0666667	45	3.93	0.562	4.92882	1.56221
1	60	30	4	0.0666667	45	5.59	0.699	6.58906	1.69947
2	60	30	4	0.0666667	45	11.7	1.43	12.7112	2.43066
4	60	30	4	0.0666667	45	22.5	2.77	23.4508	3.76578
0	60	30	4	0.116667	1	-0.285	-0.00677	0.715135	0.993228
0.001	60	30	4	0.116667	1	-0.571	-0.122	0.429081	0.878433
0.01	60	30	4	0.116667	1	-0.523	-0.117	0.476757	0.883424
0.1	60	30	4	0.116667	1	0.478	0.111	1.47795	1.11052
0.2	60	30	4	0.116667	1	0.859	0.18	1.85935	1.18039
0.4	60	30	4	0.116667	1	2.05	0.378	3.05124	1.37754
0.6	60	30	4	0.116667	1	4.2	0.522	5.19665	1.52228
0.8	60	30	4	0.116667	1	5.53	0.744	6.53157	1.74439
1	60	30	4	0.116667	1	7.06	0.917	8.05719	1.91658
2	60	30	4	0.116667	1	12.4	1.75	13.4445	2.7476
4	60	30	4	0.116667	1	25.6	3.53	26.603	4.53192
0	60	30	4	0.116667	22.5	-0.333	-0.0517	0.667459	0.948308
0.001	60	30	4	0.116667	22.5	0.0489	-0.0192	1.04886	0.980751
0.01	60	30	4	0.116667	22.5	0.0489	-0.00677	1.04886	0.993228
0.1	60	30	4	0.116667	22.5	0.669	0.0556	1.66865	1.05562
0.2	60	30	4	0.116667	22.5	1.48	0.138	2.47913	1.13797
0.4	60	30	4	0.116667	22.5	2.67	0.33	3.67103	1.33013
0.6	60	30	4	0.116667	22.5	2.96	0.422	3.95708	1.42246
0.8	60	30	4	0.116667	22.5	3.96	0.572	4.95827	1.5722
1	60	30	4	0.116667	22.5	4.96	0.739	5.95946	1.7394
2	60	30	4	0.116667	22.5	12.4	1.67	13.4445	2.67024
4	60	30	4	0.116667	22.5	25.6	3.42	26.603	4.41962
0	60	30	4	0.116667	45	-0.0942	-0.0617	0.905838	0.938326
0.001	60	30	4	0.116667	45	0.144	-0.0791	1.14422	0.920857
0.01	60	30	4	0.116667	45	0.192	-0.0692	1.19189	0.93084
0.1	60	30	4	0.116667	45	0.859	0.0406	1.85935	1.04064
0.2	60	30	4	0.116667	45	1.05	0.138	2.05005	1.13797
0.4	60	30	4	0.116667	45	1.81	0.26	2.81286	1.26025
0.6	60	30	4	0.116667	45	3.39	0.335	4.38616	1.33512
0.8	60	30	4	0.116667	45	4.44	0.457	5.43503	1.4574
1	60	30	4	0.116667	45	5.44	0.562	6.43621	1.56221
2	60	30	4	0.116667	45	10.9	1.4	11.8712	2.39822
4	60	30	4	0.116667	45	22.8	2.88	23.8378	3.87559
0	60	30	5	0.0166667	1	-0.181	-0.0841	0.819406	0.915866
0.001	60	30	5	0.0166667	1	-0.135	-0.0841	0.864929	0.915866
0.01	60	30	5	0.0166667	1	-0.0895	-0.0766	0.910451	0.923353
0.1	60	30	5	0.0166667	1	0.821	0.17	1.8209	1.17041
0.2	60	30	5	0.0166667	1	1.55	0.258	2.54926	1.25776
0.4	60	30	5	0.0166667	1	3.19	0.437	4.18808	1.43744
0.6	60	30	5	0.0166667	1	4.74	0.537	5.73584	1.53726
0.8	60	30	5	0.0166667	1	5.37	0.684	6.37316	1.6845
1	60	30	5	0.0166667	1	6.78	0.809	7.78436	1.80927
2	60	30	5	0.0166667	1	13	1.75	14.021	2.75259
4	60	30	5	0.0166667	1	24.5	3.48	25.5382	4.4845
0	60	30	5	0.0166667	22.5	-0.454	-0.0342	0.546271	0.965777
0.001	60	30	5	0.0166667	22.5	-0.454	-0.0342	0.546271	0.965777
0.01	60	30	5	0.0166667	22.5	-0.454	-0.0267	0.546271	0.973264
0.1	60	30	5	0.0166667	22.5	0.73	0.0931	1.72986	1.09305
0.2	60	30	5	0.0166667	22.5	1.23	0.195	2.23061	1.19537
0.4	60	30	5	0.0166667	22.5	2.96	0.36	3.96046	1.36007
0.6	60	30	5	0.0166667	22.5	3.92	0.485	4.91644	1.48485
0.8	60	30	5	0.0166667	22.5	5.01	0.63	6.00898	1.62959
1	60	30	5	0.0166667	22.5	6.24	0.779	7.23809	1.77933
2	60	30	5	0.0166667	22.5	12.7	1.69	13.7023	2.6927
4	60	30	5	0.0166667	22.5	25.4	3.52	26.4031	4.51694
0	60	30	5	0.0166667	45	0.047	-0.0168	1.04702	0.983246
0.001	60	30	5	0.0166667	45	0.0925	-0.0267	1.09254	0.973264
0.01	60	30	5	0.0166667	45	0.138	-0.0267	1.13806	0.973264
0.1	60	30	5	0.0166667	45	0.138	0.0182	1.13806	1.01818
0.2	60	30	5	0.0166667	45	0.684	0.0955	1.68433	1.09555
0.4	60	30	5	0.0166667	45	1.87	0.215	2.86792	1.21533
0.6	60	30	5	0.0166667	45	2.46	0.405	3.45972	1.40499
0.8	60	30	5	0.0166667	45	4.05	0.53	5.053	1.52977
1	60	30	5	0.0166667	45	4.96	0.652	5.96346	1.65205
2	60	30	5	0.0166667	45	11.8	1.48	12.7918	2.47558
4	60	30	5	0.0166667	45	23.8	3.21	24.7643	4.205
0	60	30	5	0.0666667	1	-0.0869	-0.0292	0.913129	0.970769
0.001	60	30	5	0.0666667	1	-0.0454	-0.0292	0.954635	0.970769
0.01	60	30	5	0.0666667	1	-0.00386	-0.0192	0.996141	0.980751
0.1	60	30	5	0.0666667	1	0.785	0.101	1.78475	1.10054
0.2	60	30	5	0.0666667	1	1.37	0.168	2.36583	1.16792
0.4	60	30	5	0.0666667	1	2.2	0.323	3.19595	1.32264
0.6	60	30	5	0.0666667	1	4.02	0.537	5.02221	1.53726
0.8	60	30	5	0.0666667	1	4.6	0.747	5.60329	1.74688
1	60	30	5	0.0666667	1	5.97	0.954	6.97299	1.95401
2	60	30	5	0.0666667	1	11.1	1.67	12.1197	2.66774
4	60	30	5	0.0666667	1	22.6	3.37	23.5753	4.36971
0	60	30	5	0.0666667	22.5	-0.0869	-0.102	0.913129	0.898397
0.001	60	30	5	0.0666667	22.5	-0.0869	-0.122	0.913129	0.878433
0.01	60	30	5	0.0666667	22.5	-0.00386	-0.114	0.996141	0.88592
0.1	60	30	5	0.0666667	22.5	0.0792	-0.0242	1.07915	0.97576
0.2	60	30	5	0.0666667	22.5	0.743	0.0681	1.74325	1.06809
0.4	60	30	5	0.0666667	22.5	2.15	0.225	3.15445	1.22531
0.6	60	30	5	0.0666667	22.5	2.94	0.552	3.94306	1.55223
0.8	60	30	5	0.0666667	22.5	3.98	0.615	4.9807	1.61462
1	60	30	5	0.0666667	22.5	5.31	0.822	6.30889	1.82175
2	60	30	5	0.0666667	22.5	11.3	1.65	12.3272	2.64778
4	60	30	5	0.0666667	22.5	22.8	3.46	23.7829	4.46204
0	60	30	5	0.0666667	45	-0.0454	-0.0542	0.954635	0.945813
0.001	60	30	5	0.0666667	45	-0.17	-0.0692	0.830117	0.93084
0.01	60	30	5	0.0666667	45	-0.0454	-0.0667	0.954635	0.933335
0.1	60	30	5	0.0666667	45	0.951	0.0681	1.95078	1.06809
0.2	60	30	5	0.0666667	45	1.41	0.133	2.40734	1.13298
0.4	60	30	5	0.0666667	45	2.32	0.245	3.32047	1.24528
0.6	60	30	5	0.0666667	45	3.48	0.567	4.48263	1.5672
0.8	60	30	5	0.0666667	45	3.28	0.562	4.2751	1.56221
1	60	30	5	0.0666667	45	4.52	0.699	5.52028	1.69947
2	60	30	5	0.0666667	45	9.67	1.43	10.667	2.43066
4	60	30	5	0.0666667	45	18.3	2.77	19.3417	3.76578
0	60	30	5	0.116667	1	-0.39	-0.112	0.610248	0.888415
0.001	60	30	5	0.116667	1	-0.466	-0.122	0.533967	0.878433
0.01	60	30	5	0.116667	1	-0.466	-0.117	0.533967	0.883424
0.1	60	30	5	0.116667	1	0.335	0.111	1.33492	1.11052
0.2	60	30	5	0.116667	1	0.64	0.18	1.64004	1.18039
0.4	60	30	5	0.116667	1	1.59	0.378	2.59356	1.37754
0.6	60	30	5	0.116667	1	3.73	0.562	4.72943	1.56221
0.8	60	30	5	0.116667	1	4.49	0.744	5.49224	1.74439
1	60	30	5	0.116667	1	5.79	0.917	6.78901	1.91658
2	60	30	5	0.116667	1	10.2	1.75	11.1752	2.7476
4	60	30	5	0.116667	1	20.9	3.53	21.8927	4.53192
0	60	30	5	0.116667	22.5	-0.123	-0.0168	0.877232	0.983246
0.001	60	30	5	0.116667	22.5	-0.123	-0.0192	0.877232	0.980751
0.01	60	30	5	0.116667	22.5	-0.123	-0.00677	0.877232	0.993228
0.1	60	30	5	0.116667	22.5	0.449	0.0556	1.44934	1.05562
0.2	60	30	5	0.116667	22.5	1.14	0.138	2.13587	1.13797
0.4	60	30	5	0.116667	22.5	2.2	0.33	3.2038	1.33013
0.6	60	30	5	0.116667	22.5	2.7	0.532	3.69963	1.53227
0.8	60	30	5	0.116667	22.5	3.23	0.572	4.2336	1.5722
1	60	30	5	0.116667	22.5	4.11	0.739	5.11083	1.7394
2	60	30	5	0.116667	22.5	10.1	1.67	11.137	2.67024
4	60	30	5	0.116667	22.5	20.9	3.42	21.9308	4.41962
0	60	30	5	0.116667	45	0.144	-0.0766	1.14422	0.923353
0.001	60	30	5	0.116667	45	0.144	-0.0791	1.14422	0.920857
0.01	60	30	5	0.116667	45	0.182	-0.0692	1.18236	0.93084
0.1	60	30	5	0.116667	45	0.602	0.0406	1.6019	1.04064
0.2	60	30	5	0.116667	45	0.793	0.138	1.7926	1.13797
0.4	60	30	5	0.116667	45	1.52	0.26	2.51727	1.26025
0.6	60	30	5	0.116667	45	2.39	0.442	3.39451	1.44243
0.8	60	30	5	0.116667	45	3.5	0.457	4.50058	1.4574
1	60	30	5	0.116667	45	4.38	0.562	5.37781	1.56221
2	60	30	5	0.116667	45	8.8	1.4	9.80212	2.39822
4	60	30	5	0.116667	45	18.9	2.88	19.9094	3.87559
0	60	30	8	0.0166667	1	-0.118	-0.0841	0.882	0.915866
0.001	60	30	8	0.0166667	1	-0.118	-0.0841	0.882	0.915866
0.01	60	30	8	0.0166667	1	-0.0895	-0.0766	0.910451	0.923353
0.1	60	30	8	0.0166667	1	0.508	0.17	1.50794	1.17041
0.2	60	30	8	0.0166667	1	1.05	0.258	2.04852	1.25776
0.4	60	30	8	0.0166667	1	2.07	0.437	3.07277	1.43744
0.6	60	30	8	0.0166667	1	2.47	0.532	3.4711	1.53227
0.8	60	30	8	0.0166667	1	3.67	0.684	4.66606	1.6845
1	60	30	8	0.0166667	1	4.43	0.809	5.43426	1.80927
2	60	30	8	0.0166667	1	8.73	1.75	9.73045	2.75259
4	60	30	8	0.0166667	1	16.9	3.48	17.8961	4.4845
0	60	30	8	0.0166667	22.5	-0.459	-0.0342	0.540581	0.965777
0.001	60	30	8	0.0166667	22.5	-0.459	-0.0342	0.540581	0.965777
0.01	60	30	8	0.0166667	22.5	-0.431	-0.0267	0.569032	0.973264
0.1	60	30	8	0.0166667	22.5	0.565	0.0931	1.56484	1.09305
0.2	60	30	8	0.0166667	22.5	0.992	0.195	1.99161	1.19537
0.4	60	30	8	0.0166667	22.5	2.1	0.36	3.10122	1.36007
0.6	60	30	8	0.0166667	22.5	2.19	0.45	3.18658	1.44991
0.8	60	30	8	0.0166667	22.5	3.24	0.63	4.23929	1.62959
1	60	30	8	0.0166667	22.5	3.98	0.779	4.97903	1.77933
2	60	30	8	0.0166667	22.5	8.7	1.69	9.702	2.6927
4	60	30	8	0.0166667	22.5	17.2	3.52	18.1806	4.51694
0	60	30	8	0.0166667	45	-0.0611	-0.0168	0.938903	0.983246
0.001	60	30	8	0.0166667	45	-0.0326	-0.0267	0.967355	0.973264
0.01	60	30	8	0.0166667	45	0.0243	-0.0267	1.02426	0.973264
0.1	60	30	8	0.0166667	45	0.0243	0.0182	1.02426	1.01818
0.2	60	30	8	0.0166667	45	0.565	0.0955	1.56484	1.09555
0.4	60	30	8	0.0166667	45	1.22	0.215	2.21923	1.21533
0.6	60	30	8	0.0166667	45	2.19	0.412	3.18658	1.41248
0.8	60	30	8	0.0166667	45	2.67	0.53	3.67026	1.52977
1	60	30	8	0.0166667	45	3.3	0.652	4.29619	1.65205
2	60	30	8	0.0166667	45	7.91	1.48	8.90535	2.47558
4	60	30	8	0.0166667	45	16.2	3.21	17.1563	4.205
0	60	30	8	0.0666667	1	-0.0402	-0.0292	0.959823	0.970769
0.001	60	30	8	0.0666667	1	0.0117	-0.0292	1.01171	0.970769
0.01	60	30	8	0.0666667	1	0.0117	-0.0192	1.01171	0.980751
0.1	60	30	8	0.0666667	1	0.453	0.101	1.45271	1.10054
0.2	60	30	8	0.0666667	1	0.868	0.168	1.86776	1.16792
0.4	60	30	8	0.0666667	1	1.33	0.323	2.33471	1.32264
0.6	60	30	8	0.0666667	1	2.35	0.562	3.34641	1.56221
0.8	60	30	8	0.0666667	1	3.31	0.747	4.30623	1.74688
1	60	30	8	0.0666667	1	4.03	0.954	5.03259	1.95401
2	60	30	8	0.0666667	1	7.38	1.67	8.379	2.66774
4	60	30	8	0.0666667	1	15.5	3.37	16.4726	4.36971
0	60	30	8	0.0666667	22.5	-0.118	-0.102	0.882	0.898397
0.001	60	30	8	0.0666667	22.5	-0.17	-0.122	0.830117	0.878433
0.01	60	30	8	0.0666667	22.5	-0.144	-0.114	0.856059	0.88592
0.1	60	30	8	0.0666667	22.5	-0.0142	-0.0242	0.985764	0.97576
0.2	60	30	8	0.0666667	22.5	0.531	0.0681	1.53053	1.06809
0.4	60	30	8	0.0666667	22.5	1.31	0.225	2.30876	1.22531
0.6	60	30	8	0.0666667	22.5	1.8	0.465	2.80165	1.46489
0.8	60	30	8	0.0666667	22.5	2.53	0.615	3.528	1.61462
1	60	30	8	0.0666667	22.5	3.51	0.822	4.51376	1.82175
2	60	30	8	0.0666667	22.5	7.77	1.65	8.76811	2.64778
4	60	30	8	0.0666667	22.5	15.2	3.46	16.2132	4.46204
0	60	30	8	0.0666667	45	0.0636	-0.0542	1.06359	0.945813
0.001	60	30	8	0.0666667	45	0.0117	-0.0692	1.01171	0.93084
0.01	60	30	8	0.0666667	45	0.0117	-0.0667	1.01171	0.933335
0.1	60	30	8	0.0666667	45	0.479	0.0681	1.47865	1.06809
0.2	60	30	8	0.0666667	45	0.686	0.133	1.68618	1.13298
0.4	60	30	8	0.0666667	45	1.33	0.245	2.33471	1.24528
0.6	60	30	8	0.0666667	45	1.59	0.417	2.59412	1.41747
0.8	60	30	8	0.0666667	45	2.19	0.562	3.19076	1.56221
1	60	30	8	0.0666667	45	3.07	0.699	4.07276	1.69947
2	60	30	8	0.0666667	45	6.89	1.43	7.88612	2.43066
4	60	30	8	0.0666667	45	12.6	2.77	13.5932	3.76578
0	60	30	8	0.116667	1	-0.309	-0.112	0.691297	0.888415
0.001	60	30	8	0.116667	1	-0.38	-0.122	0.619784	0.878433
0.01	60	30	8	0.116667	1	-0.356	-0.117	0.643621	0.883424
0.1	60	30	8	0.116667	1	0.335	0.111	1.33492	1.11052
0.2	60	30	8	0.116667	1	0.621	0.18	1.62097	1.18039
0.4	60	30	8	0.116667	1	1.19	0.378	2.19308	1.37754
0.6	60	30	8	0.116667	1	2.41	0.522	3.40881	1.52228
0.8	60	30	8	0.116667	1	2.96	0.744	3.95708	1.74439
1	60	30	8	0.116667	1	3.82	0.917	4.81524	1.91658
2	60	30	8	0.116667	1	6.82	1.75	7.81881	2.7476
4	60	30	8	0.116667	1	14.4	3.53	15.3516	4.53192
0	60	30	8	0.116667	22.5	-0.118	-0.0168	0.882	0.983246
0.001	60	30	8	0.116667	22.5	-0.0942	-0.0192	0.905838	0.980751
0.01	60	30	8	0.116667	22.5	-0.0942	-0.00677	0.905838	0.993228
0.1	60	30	8	0.116667	22.5	0.478	0.0556	1.47795	1.05562
0.2	60	30	8	0.116667	22.5	0.669	0.138	1.66865	1.13797
0.4	60	30	8	0.116667	22.5	1.34	0.33	2.33611	1.33013
0.6	60	30	8	0.116667	22.5	1.53	0.422	2.52681	1.42246
0.8	60	30	8	0.116667	22.5	2.08	0.572	3.07508	1.5722
1	60	30	8	0.116667	22.5	2.65	0.739	3.64719	1.7394
2	60	30	8	0.116667	22.5	6.58	1.67	7.58043	2.67024
4	60	30	8	0.116667	22.5	14.4	3.42	15.4469	4.41962
0	60	30	8	0.116667	45	0.216	-0.0766	1.21573	0.923353
0.001	60	30	8	0.116667	45	0.24	-0.0791	1.23957	0.920857
0.01	60	30	8	0.116667	45	0.216	-0.0692	1.21573	0.93084
0.1	60	30	8	0.116667	45	0.335	0.0406	1.33492	1.04064
0.2	60	30	8	0.116667	45	0.549	0.138	1.54946	1.13797
0.4	60	30	8	0.116667	45	0.955	0.26	1.9547	1.26025
0.6	60	30	8	0.116667	45	2	0.335	3.00357	1.33512
0.8	60	30	8	0.116667	45	2.27	0.457	3.26578	1.4574
1	60	30	8	0.116667	45	2.93	0.562	3.93324	1.56221
2	60	30	8	0.116667	45	6.06	1.4	7.056	2.39822
4	60	30	8	0.116667	45	12.8	2.88	13.8259	3.87559
0	60	30	10	0.0166667	1	-0.226	-0.0841	0.773884	0.915866
0.001	60	30	10	0.0166667	1	-0.226	-0.0841	0.773884	0.915866
0.01	60	30	10	0.0166667	1	-0.203	-0.0766	0.796645	0.923353
0.1	60	30	10	0.0166667	1	0.525	0.17	1.52501	1.17041
0.2	60	30	10	0.0166667	1	0.957	0.258	1.95747	1.25776
0.4	60	30	10	0.0166667	1	1.73	0.437	2.73135	1.43744
0.6	60	30	10	0.0166667	1	2.12	0.532	3.1183	1.53227
0.8	60	30	10	0.0166667	1	3.01	0.684	4.00599	1.6845
1	60	30	10	0.0166667	1	3.64	0.809	4.6433	1.80927
2	60	30	10	0.0166667	1	7.31	1.75	8.30787	2.75259
4	60	30	10	0.0166667	1	14	3.48	15.0452	4.4845
0	60	30	10	0.0166667	22.5	-0.363	-0.0342	0.637316	0.965777
0.001	60	30	10	0.0166667	22.5	-0.363	-0.0342	0.637316	0.965777
0.01	60	30	10	0.0166667	22.5	-0.34	-0.0267	0.660077	0.973264
0.1	60	30	10	0.0166667	22.5	0.502	0.0931	1.50224	1.09305
0.2	60	30	10	0.0166667	22.5	0.889	0.195	1.88919	1.19537
0.4	60	30	10	0.0166667	22.5	1.91	0.36	2.91344	1.36007
0.6	60	30	10	0.0166667	22.5	1.85	0.45	2.84516	1.44991
0.8	60	30	10	0.0166667	22.5	2.71	0.63	3.71009	1.62959
1	60	30	10	0.0166667	22.5	3.32	0.779	4.32464	1.77933
2	60	30	10	0.0166667	22.5	7.03	1.69	8.03473	2.6927
4	60	30	10	0.0166667	22.5	14.6	3.52	15.5687	4.51694
0	60	30	10	0.0166667	45	0.115	-0.0168	1.1153	0.983246
0.001	60	30	10	0.0166667	45	0.115	-0.0267	1.1153	0.973264
0.01	60	30	10	0.0166667	45	0.138	-0.0267	1.13806	0.973264
0.1	60	30	10	0.0166667	45	0.115	0.0182	1.1153	1.01818
0.2	60	30	10	0.0166667	45	0.571	0.0955	1.57053	1.09555
0.4	60	30	10	0.0166667	45	1.14	0.215	2.13956	1.21533
0.6	60	30	10	0.0166667	45	1.78	0.412	2.77688	1.41248
0.8	60	30	10	0.0166667	45	2.23	0.53	3.2321	1.52977
1	60	30	10	0.0166667	45	2.8	0.652	3.80113	1.65205
2	60	30	10	0.0166667	45	6.56	1.48	7.55675	2.47558
4	60	30	10	0.0166667	45	13.6	3.21	14.5672	4.205
0	60	30	10	0.0666667	1	-0.0246	-0.0292	0.975388	0.970769
0.001	60	30	10	0.0666667	1	0.0169	-0.0292	1.01689	0.970769
0.01	60	30	10	0.0666667	1	0.0376	-0.0192	1.03765	0.980751
0.1	60	30	10	0.0666667	1	0.39	0.101	1.39045	1.10054
0.2	60	30	10	0.0666667	1	0.702	0.168	1.70174	1.16792
0.4	60	30	10	0.0666667	1	1.16	0.323	2.15831	1.32264
0.6	60	30	10	0.0666667	1	1.97	0.562	2.96767	1.56221
0.8	60	30	10	0.0666667	1	2.76	0.747	3.75628	1.74688
1	60	30	10	0.0666667	1	3.46	0.954	4.46188	1.95401
2	60	30	10	0.0666667	1	6.22	1.67	7.22202	2.66774
4	60	30	10	0.0666667	1	13.2	3.37	14.1743	4.36971
0	60	30	10	0.0666667	22.5	-0.0246	-0.102	0.975388	0.898397
0.001	60	30	10	0.0666667	22.5	-0.0661	-0.122	0.933882	0.878433
0.01	60	30	10	0.0666667	22.5	-0.0454	-0.114	0.954635	0.88592
0.1	60	30	10	0.0666667	22.5	0.141	-0.0242	1.14141	0.97576
0.2	60	30	10	0.0666667	22.5	0.473	0.0681	1.47346	1.06809
0.4	60	30	10	0.0666667	22.5	1.14	0.225	2.13755	1.22531
0.6	60	30	10	0.0666667	22.5	1.47	0.465	2.4696	1.46489
0.8	60	30	10	0.0666667	22.5	2.15	0.615	3.15445	1.61462
1	60	30	10	0.0666667	22.5	2.9	0.822	3.90155	1.82175
2	60	30	10	0.0666667	22.5	6.64	1.65	7.63708	2.64778
4	60	30	10	0.0666667	22.5	12.9	3.46	13.946	4.46204
0	60	30	10	0.0666667	45	0.0584	-0.0542	1.0584	0.945813
0.001	60	30	10	0.0666667	45	0.0169	-0.0692	1.01689	0.93084
0.01	60	30	10	0.0666667	45	0.0584	-0.0667	1.0584	0.933335
0.1	60	30	10	0.0666667	45	0.37	0.0681	1.36969	1.06809
0.2	60	30	10	0.0666667	45	0.66	0.133	1.66023	1.13298
0.4	60	30	10	0.0666667	45	1.16	0.245	2.15831	1.24528
0.6	60	30	10	0.0666667	45	1.32	0.417	2.32433	1.41747
0.8	60	30	10	0.0666667	45	1.91	0.562	2.90541	1.56221
1	60	30	10	0.0666667	45	2.38	0.699	3.38273	1.69947
2	60	30	10	0.0666667	45	5.64	1.43	6.64094	2.43066
4	60	30	10	0.0666667	45	10.8	2.77	11.7669	3.76578
0	60	30	10	0.116667	1	-0.294	-0.112	0.7056	0.888415
0.001	60	30	10	0.116667	1	-0.352	-0.122	0.648389	0.878433
0.01	60	30	10	0.116667	1	-0.333	-0.117	0.667459	0.883424
0.1	60	30	10	0.116667	1	0.182	0.111	1.18236	1.11052
0.2	60	30	10	0.116667	1	0.468	0.18	1.46841	1.18039
0.4	60	30	10	0.116667	1	0.964	0.378	1.96424	1.37754
0.6	60	30	10	0.116667	1	1.96	0.522	2.95589	1.52228
0.8	60	30	10	0.116667	1	2.6	0.744	3.60428	1.74439
1	60	30	10	0.116667	1	3.14	0.917	4.13825	1.91658
2	60	30	10	0.116667	1	5.81	1.75	6.80808	2.7476
4	60	30	10	0.116667	1	11.9	3.53	12.9487	4.53192
0	60	30	10	0.116667	22.5	-0.0465	-0.0168	0.953513	0.983246
0.001	60	30	10	0.116667	22.5	-0.00835	-0.0192	0.991654	0.980751
0.01	60	30	10	0.116667	22.5	-0.00835	-0.00677	0.991654	0.993228
0.1	60	30	10	0.116667	22.5	0.335	0.0556	1.33492	1.05562
0.2	60	30	10	0.116667	22.5	0.545	0.138	1.54469	1.13797
0.4	60	30	10	0.116667	22.5	1.17	0.33	2.17401	1.33013
0.6	60	30	10	0.116667	22.5	1.25	0.422	2.25029	1.42246
0.8	60	30	10	0.116667	22.5	1.8	0.572	2.80333	1.5722
1	60	30	10	0.116667	22.5	2.24	0.739	3.24194	1.7394
2	60	30	10	0.116667	22.5	5.43	1.67	6.42668	2.67024
4	60	30	10	0.116667	22.5	12	3.42	13.0441	4.41962
0	60	30	10	0.116667	45	0.278	-0.0766	1.27771	0.923353
0.001	60	30	10	0.116667	45	0.278	-0.0791	1.27771	0.920857
0.01	60	30	10	0.116667	45	0.259	-0.0692	1.25864	0.93084
0.1	60	30	10	0.116667	45	0.24	0.0406	1.23957	1.04064
0.2	60	30	10	0.116667	45	0.468	0.138	1.46841	1.13797
0.4	60	30	10	0.116667	45	0.735	0.26	1.73539	1.26025
0.6	60	30	10	0.116667	45	1.61	0.335	2.61263	1.33512
0.8	60	30	10	0.116667	45	1.82	0.457	2.8224	1.4574
1	60	30	10	0.116667	45	2.39	0.562	3.39451	1.56221
2	60	30	10	0.116667	45	5.01	1.4	6.00713	2.39822
4	60	30	10	0.116667	45	10.6	2.88	11.5757	3.87559
0	60	30	20	0.0166667	1	-0.249	-0.0841	0.751122	0.915866
0.001	60	30	20	0.0166667	1	-0.249	-0.0841	0.751122	0.915866
0.01	60	30	20	0.0166667	1	-0.226	-0.0766	0.773884	0.923353
0.1	60	30	20	0.0166667	1	0.309	0.17	1.30877	1.17041
0.2	60	30	20	0.0166667	1	0.673	0.258	1.67295	1.25776
0.6	60	30	20	0.0166667	1	1.37	0.532	2.36717	1.53227
0.8	60	30	20	0.0166667	1	1.81	0.684	2.81102	1.6845
1	60	30	20	0.0166667	1	2.18	0.809	3.1752	1.80927
2	60	30	20	0.0166667	1	4.64	1.75	5.6448	2.75259
4	60	30	20	0.0166667	1	9.08	3.48	10.0832	4.4845
[truncated: 14,384 more rows]
